1    **Effects of 105 biological, socioeconomic, behavioural, and environmental factors on the risk of**  
2    **SARS-CoV-2 infection and a severe course of Covid-19: A prospective longitudinal study**

3

4    Jaroslav Flegr<sup>1</sup>, and Pavel Flegr<sup>2</sup>, Lenka Příplatová<sup>1</sup>

5

6    <sup>1</sup> Division of Biology, Faculty of Science, Charles University, Prague, Czech Republic

7    <sup>2</sup> Faculty of Electrical Engineering, Czech Technical University in Prague, Prague, Czech Republic

8

9

10

11

12

13    \* **Corresponding author:** *Jaroslav Flegr, Laboratory of Evolutionary Biology, Department of Philosophy and*  
14    *History of Sciences, Faculty of Science, Charles University, Viničná 7, 128 00 Prague 2, Czech Republic, Tel:*  
15    *+(420)221951821, e-mail: [flegr@cesnet.cz](mailto:flegr@cesnet.cz)*

16

17 Abstract

18 The confirmed number of SARS-CoV-2 infections up to 30 August 2021 is 217 mil. worldwide but  
19 information about factors affecting the probability of infection or of a severe course of Covid-19  
20 remains insufficient and often speculative. Only a small number of factors have been rigorously  
21 examined, mostly by retrospective or cross-sectional studies. We ran a preregistered study on 5,164  
22 internet users who shared with us information about their exposure to 105 risk factors and reported  
23 being Covid negative before the beginning of the fourth wave of Covid-19 in the Czech Republic.  
24 After the fourth wave, in which 709 (13.7%) of participants were infected, we used a partial Kendall  
25 test controlled for sex, age, and urbanisation to compare the risk of infection and of a severe course  
26 of the disease in subjects who originally did and did not report exposure to particular risk factors.  
27 After the correction for multiple tests, we identified 13 factors – including male sex, lower age, blood  
28 group B, and the larger household size – that increased the risk of infection and 16 factors – including  
29 mask wearing, borreliosis in the past, use of vitamin D supplements, or rooibos drinking – that  
30 decreased it. We also identified 23 factors that increased the risk of a severe course of Covid-19 and  
31 12 factors that decreased the risk.

32

33 Introduction

34 According to Covid-19 Data Explorer, up to 29 August, SARS-CoV-2 had infected 217 million of  
35 subjects in all continents and has been associated with the death of 4.51 million of persons. Despite  
36 the exceptional impact of the Covid-19 pandemic on public health and world economy, a surprisingly  
37 small number of studies has been published about risk factors for SARS-CoV-19 infection and about  
38 factors that protect individuals against the infection. Search in bibliographic databases for ‘risk  
39 factor’ AND ‘Covid’ resulted in 1,583 hits in WOS and 1,853 hits in PubMed (as of 23 July 2021) but an  
40 overwhelming majority of original articles reported only risk factors for a severe course of the  
41 disease or death in the population of Covid-19 patients, and nearly all articles that dealt with the  
42 general population focused on the risk of a severe course or death of Covid-19. Studies searching for  
43 risk factors of any (both symptomatic and asymptomatic) infection are surprisingly rare. All in all, less  
44 than twenty papers presented the results of prospective longitudinal studies on the risk (or  
45 protective) factors associated with Covid-19.

46 Moreover, the range of factors examined by these retrospective or cross-sectional studies was rather  
47 limited. Factors significantly or non-significantly associated with Covid-19 were sex <sup>1</sup>, age <sup>1</sup>, ethnicity  
48 <sup>2</sup>, urbanisation <sup>3</sup>, residence in a multifamily unit <sup>4</sup>, BMI and obesity <sup>2,5,6</sup>, smoking <sup>2,7</sup>, physical fitness  
49 and forced expiratory volume <sup>2</sup>, the number of daily contacts <sup>3</sup>, wearing masks and washing hands <sup>3</sup>,

50 socioeconomic deprivation <sup>2</sup>, particular AB0 blood groups [8-10], Rh factor [10], vitamin D deficiency  
51 [11], high-density lipoprotein level <sup>2</sup>, use of immunosuppressants <sup>8</sup>, and a growing set of  
52 comorbidities – cardiovascular disease, chronic obstructive pulmonary disease (COPD), chronic  
53 kidney disease, dementia, hypertension and functional dependence <sup>6</sup>, and toxoplasmosis <sup>9</sup>.  
54 Other factors, such as contact with animals, have been suggested only on a theoretical basis <sup>10</sup> or are  
55 merely discussed in non-scientific sources, such as popular literature or the internet.  
56 The main aim of the present exploratory study was to perform a systematic investigation of both the  
57 known and still unknown factors which might positively or negatively affect the risk of SARS-CoV-2  
58 infection, and to search for factors that might affect the risk of a severe course of Covid-19. To this  
59 purpose, we ran a large prospective longitudinal study on the 5,164 originally Covid-negative  
60 subjects. To avoid possible cherry-picking artifacts, we preregistered the study before the start of  
61 data collection, reported the results of all – both significant and non-significant – tests, and  
62 controlled for the effect of multiple statistical tests by the Benjamini-Hochberg procedure.

63

## 64 **Results**

65 In total, 8,084 subjects completed both questionnaires. We excluded 827 subjects who finished the  
66 first questionnaire in under 300 seconds or the second questionnaire in under 600 seconds and those  
67 who were younger than 15 years. From the remaining 7,257, we excluded 1,262 (17.4%) subjects  
68 who had been diagnosed with Covid-19 already before answering the first questionnaire. From the  
69 remaining 5,995 subjects, we excluded 578 participants who had not been diagnosed with Covid-19  
70 but suspected they had suffered from it, 13 subjects who were awaiting the results of diagnostic  
71 tests when filling the second questionnaire, and 240 subjects who did not respond to the question  
72 about their infection status. The final set of originally Covid-negative subjects thus consisted of 5,164  
73 responders: 1,746 men (mean age 42.10, SD 12.28), 3,411 women (mean age 43.46, SD 11.96), and 7  
74 subjects who did not answer the question about their sex (they were included only in tests of the  
75 whole population, and only age and urbanisation were controlled for in partial Kendall tests). The  
76 difference in age between men and women was significant ( $t_{3437} = -3.82$ ,  $p = 0.0001$ ). This set  
77 contained 709 (13.7%) subjects who did and 4,455 (86.3%) who did not contract a SARS-CoV-2  
78 infection between completing the first and the second questionnaire. The incidence of infected  
79 individuals was non-significantly lower in the 3,411 women (12.13%) than in the 1,746 men (13.52%)  
80 (OR = 0.889, C.I.<sub>.95</sub> = 0.751-1.054,  $\text{Chi}^2 = 1.82$ ,  $p = 0.177$ ); the effect of sex did, however, turn  
81 significant when the more sensitive partial Kendall correlation test controlled for age and  
82 urbanisation was applied (see Table 3). Other characteristics of the population are described in  
83 Tables 1 and 2. The average time since the start of Covid-19 infection was 69.7 days. The mental

84 health of women ( $p = 1.1 \cdot 10^{-6}$ ) and physical health of both men ( $p = 5.0 \cdot 10^{-45}$ ) and women ( $p = 2.6 \cdot 10^{-119}$ ) who had had a Covid-19 infection was significantly worse than in those who avoided the infection  
 85  
 86 (see Fig. 1).

87 Fig. 1. Mental and physical health of participants of the study after the end of the fourth wave of  
 88 Covid-19 in the Czech Republic

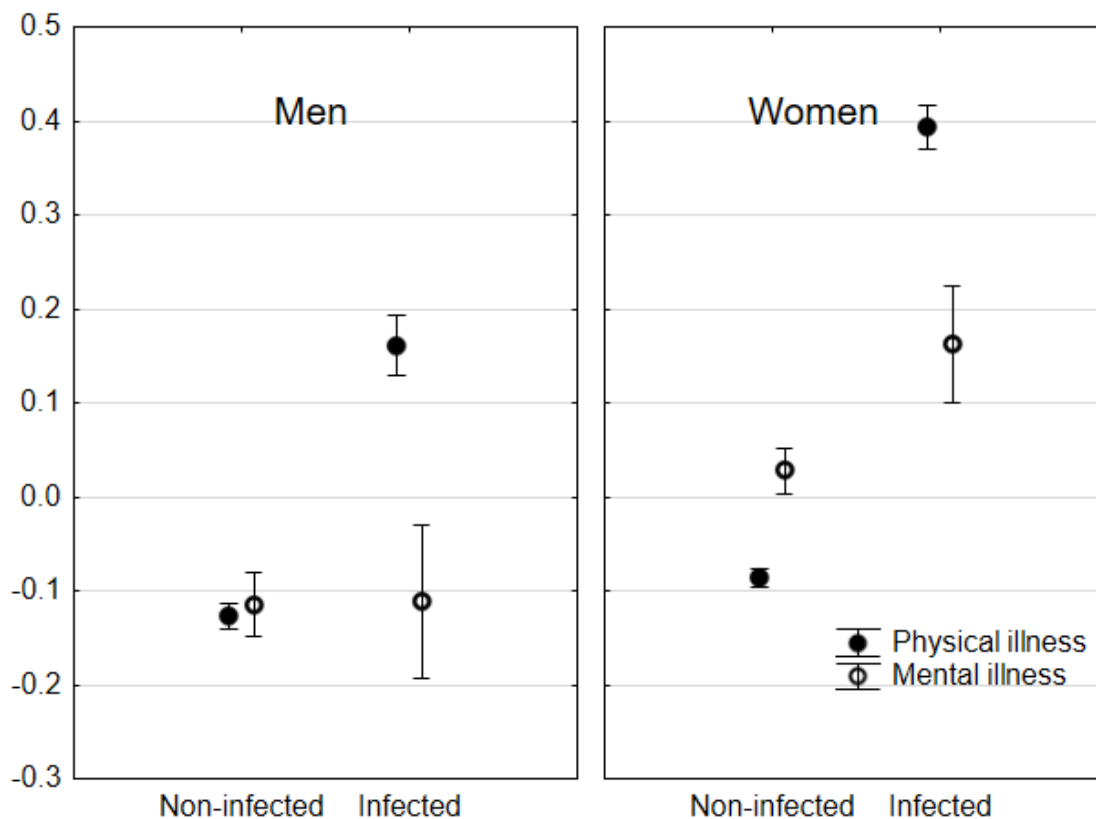

89

90

91 Numbers in graphs show the number of subjects in different categories; error bars show the 95%  
 92 confidence interval.

93 Table 1. Exposure to various factors in Covid-negative and Covid-positive subjects

|                | Number of cases |       |            |     | Fraction of cases |      |            |      | OR   | CI <sub>95</sub> Low | CI <sub>95</sub> High |
|----------------|-----------------|-------|------------|-----|-------------------|------|------------|------|------|----------------------|-----------------------|
|                | Covid-minus     |       | Covid-plus |     | Covid-minus       |      | Covid-plus |      |      |                      |                       |
|                | No              | Yes   | No         | Yes | No                | Yes  | No         | Yes  |      |                      |                       |
| Female sex     | 1,490           | 2,959 | 256        | 452 | 33.5              | 66.5 | 36.2       | 63.8 | 0.89 | 0.75                 | 1.05                  |
| Blood group A  | 2,067           | 1,200 | 335        | 192 | 63.3              | 36.7 | 63.6       | 36.4 | 0.99 | 0.81                 | 1.20                  |
| Blood group B  | 2,614           | 653   | 403        | 124 | 80.0              | 20.0 | 76.5       | 23.5 | 1.23 | 0.98                 | 1.54                  |
| Blood group AB | 2,979           | 288   | 482        | 45  | 91.2              | 8.8  | 91.5       | 8.5  | 0.97 | 0.68                 | 1.35                  |

|                                       |       |       |     |     |      |      |      |      |      |      |      |
|---------------------------------------|-------|-------|-----|-----|------|------|------|------|------|------|------|
| Blood group 0                         | 2,141 | 1,126 | 361 | 166 | 65.5 | 34.5 | 68.5 | 31.5 | 0.87 | 0.71 | 1.07 |
| Rh-positivity                         | 667   | 2,376 | 102 | 390 | 21.9 | 78.1 | 20.7 | 79.3 | 1.07 | 0.85 | 1.37 |
| Rh-heterozygosity                     | 667   | 256   | 102 | 37  | 72.3 | 27.7 | 73.4 | 26.6 | 0.95 | 0.61 | 1.43 |
| Living single                         | 3,734 | 713   | 623 | 85  | 84.0 | 16.0 | 88.0 | 12.0 | 0.71 | 0.56 | 0.91 |
| Wearing glasses                       | 1,833 | 1,177 | 257 | 168 | 60.9 | 39.1 | 60.5 | 39.5 | 1.02 | 0.82 | 1.26 |
| Tobacco smoking                       | 2,664 | 683   | 413 | 79  | 79.6 | 20.4 | 83.9 | 16.1 | 0.75 | 0.57 | 0.97 |
| Marihuana consumption                 | 3,223 | 124   | 478 | 14  | 96.3 | 3.7  | 97.2 | 2.8  | 0.76 | 0.40 | 1.34 |
| Daily alcohol consumption             | 3,042 | 305   | 450 | 42  | 90.9 | 9.1  | 91.5 | 8.5  | 0.93 | 0.65 | 1.31 |
| Snoring                               | 2,690 | 657   | 396 | 96  | 80.4 | 19.6 | 80.5 | 19.5 | 0.99 | 0.77 | 1.27 |
| Frequent singing                      | 2,969 | 378   | 424 | 68  | 88.7 | 11.3 | 86.2 | 13.8 | 1.26 | 0.94 | 1.67 |
| Sport                                 | 2,326 | 1,021 | 319 | 173 | 69.5 | 30.5 | 64.8 | 35.2 | 1.24 | 1.01 | 1.51 |
| Cold water swimming                   | 2,995 | 352   | 422 | 70  | 89.5 | 10.5 | 85.8 | 14.2 | 1.41 | 1.05 | 1.87 |
| Vitamins and supplements              | 1,217 | 2130  | 203 | 289 | 36.4 | 63.6 | 41.3 | 58.7 | 0.81 | 0.67 | 0.99 |
| Volunteering                          | 3,136 | 211   | 459 | 33  | 93.7 | 6.3  | 93.3 | 6.7  | 1.07 | 0.71 | 1.57 |
| Walking in nature                     | 1,070 | 1,023 | 133 | 112 | 51.1 | 48.9 | 54.3 | 45.7 | 0.88 | 0.67 | 1.16 |
| Frequent use of sauna                 | 1,925 | 168   | 228 | 17  | 92.0 | 8.0  | 93.1 | 6.9  | 0.85 | 0.48 | 1.44 |
| Dog                                   | 1,921 | 2,518 | 299 | 409 | 43.3 | 56.7 | 42.2 | 57.8 | 1.04 | 0.89 | 1.23 |
| Cat                                   | 2,243 | 2,196 | 350 | 358 | 50.5 | 49.5 | 49.4 | 50.6 | 1.04 | 0.89 | 1.23 |
| Bird                                  | 3,597 | 842   | 572 | 136 | 81.0 | 19.0 | 80.8 | 19.2 | 1.02 | 0.82 | 1.25 |
| Reptile                               | 4,116 | 323   | 646 | 62  | 92.7 | 7.3  | 91.2 | 8.8  | 1.22 | 0.90 | 1.63 |
| Fish                                  | 3,240 | 1,199 | 524 | 184 | 73.0 | 27.0 | 74.0 | 26.0 | 0.95 | 0.79 | 1.14 |
| Rabbit                                | 3,656 | 783   | 576 | 132 | 82.4 | 17.6 | 81.4 | 18.6 | 1.07 | 0.87 | 1.32 |
| Guinea pigs, hamster                  | 3,159 | 1,280 | 486 | 222 | 71.2 | 28.8 | 68.6 | 31.4 | 1.13 | 0.95 | 1.34 |
| Fowls                                 | 3,723 | 716   | 591 | 117 | 83.9 | 16.1 | 83.5 | 16.5 | 1.03 | 0.82 | 1.28 |
| Goats, sheep                          | 4,239 | 200   | 683 | 25  | 95.5 | 4.5  | 96.5 | 3.5  | 0.78 | 0.49 | 1.19 |
| Mouse, rat                            | 3,027 | 311   | 434 | 58  | 90.7 | 9.3  | 88.2 | 11.8 | 1.30 | 0.95 | 1.76 |
| Pig                                   | 3,193 | 145   | 469 | 23  | 95.7 | 4.3  | 95.3 | 4.7  | 1.08 | 0.66 | 1.71 |
| Horse                                 | 3,241 | 97    | 473 | 19  | 97.1 | 2.9  | 96.1 | 3.9  | 1.34 | 0.77 | 2.24 |
| Being overweight                      | 2,064 | 1,283 | 303 | 189 | 61.7 | 38.3 | 61.6 | 38.4 | 1.00 | 0.82 | 1.22 |
| Overweight BMI>25                     | 1,877 | 2,438 | 292 | 399 | 43.5 | 56.5 | 42.3 | 57.7 | 1.05 | 0.89 | 1.24 |
| Obesity BMI>30                        | 3,289 | 1,026 | 517 | 174 | 76.2 | 23.8 | 74.8 | 25.2 | 1.08 | 0.89 | 1.30 |
| Underweight                           | 4,221 | 94    | 676 | 15  | 97.8 | 2.2  | 97.8 | 2.2  | 1.00 | 0.53 | 1.74 |
| Diabetes                              | 3,215 | 132   | 477 | 15  | 96.1 | 3.9  | 97.0 | 3.0  | 0.77 | 0.41 | 1.32 |
| Cardiovascular problems               | 3,044 | 303   | 454 | 38  | 90.9 | 9.1  | 92.3 | 7.7  | 0.84 | 0.58 | 1.20 |
| Asthma                                | 2,998 | 349   | 441 | 51  | 89.6 | 10.4 | 89.6 | 10.4 | 0.99 | 0.71 | 1.36 |
| Chronic obstructive pulmonary disease | 3,272 | 75    | 486 | 6   | 97.8 | 2.2  | 98.8 | 1.2  | 0.54 | 0.19 | 1.24 |
| Immunodeficiency                      | 3,037 | 310   | 454 | 38  | 90.7 | 9.3  | 92.3 | 7.7  | 0.82 | 0.56 | 1.17 |
| Allergy                               | 2,521 | 826   | 365 | 127 | 75.3 | 24.7 | 74.2 | 25.8 | 1.06 | 0.85 | 1.32 |
| Autoimmunity                          | 1,877 | 216   | 215 | 30  | 89.7 | 10.3 | 87.8 | 12.2 | 1.21 | 0.78 | 1.84 |
| Toxoplasmosis                         | 633   | 153   | 104 | 25  | 80.5 | 19.5 | 80.6 | 19.4 | 0.99 | 0.59 | 1.62 |
| Borreliosis                           | 993   | 560   | 179 | 63  | 63.9 | 36.1 | 74.0 | 26.0 | 0.62 | 0.45 | 0.85 |
| Depression                            | 2,978 | 369   | 437 | 55  | 89.0 | 11.0 | 88.8 | 11.2 | 1.02 | 0.74 | 1.38 |
| Anxiety                               | 2,588 | 759   | 361 | 131 | 77.3 | 22.7 | 73.4 | 26.6 | 1.24 | 0.99 | 1.54 |
| Vitamin A                             | 1,026 | 93    | 83  | 7   | 91.7 | 8.3  | 92.2 | 7.8  | 0.93 | 0.35 | 2.08 |

|                           |       |     |    |    |      |      |       |      |      |      |       |
|---------------------------|-------|-----|----|----|------|------|-------|------|------|------|-------|
| Vitamin B                 | 670   | 449 | 52 | 38 | 59.9 | 40.1 | 57.8  | 42.2 | 1.09 | 0.69 | 1.72  |
| Vitamin C                 | 367   | 752 | 26 | 64 | 32.8 | 67.2 | 28.9  | 71.1 | 1.20 | 0.74 | 2.01  |
| Vitamin D                 | 328   | 791 | 36 | 54 | 29.3 | 70.7 | 40.0  | 60.0 | 0.62 | 0.39 | 1.00  |
| Vitamin E                 | 990   | 129 | 82 | 8  | 88.5 | 11.5 | 91.1  | 8.9  | 0.75 | 0.31 | 1.59  |
| Vitamin K                 | 1,024 | 95  | 83 | 7  | 91.5 | 8.5  | 92.2  | 7.8  | 0.91 | 0.34 | 2.04  |
| Magnesium                 | 644   | 475 | 52 | 38 | 57.6 | 42.4 | 57.8  | 42.2 | 0.99 | 0.62 | 1.56  |
| Zinc                      | 792   | 327 | 69 | 21 | 70.8 | 29.2 | 76.7  | 23.3 | 0.74 | 0.42 | 1.24  |
| Selenium fluorine iodine  | 1,017 | 102 | 82 | 8  | 90.9 | 9.1  | 91.1  | 8.9  | 0.97 | 0.40 | 2.09  |
| Calcium                   | 920   | 199 | 76 | 14 | 82.2 | 17.8 | 84.4  | 15.6 | 0.85 | 0.44 | 1.56  |
| Iron                      | 983   | 136 | 82 | 8  | 87.8 | 12.2 | 91.1  | 8.9  | 0.71 | 0.29 | 1.50  |
| Antioxidants              | 994   | 125 | 78 | 12 | 88.8 | 11.2 | 86.7  | 13.3 | 1.22 | 0.59 | 2.34  |
| Fatty acids               | 841   | 278 | 66 | 24 | 75.2 | 24.8 | 73.3  | 26.7 | 1.10 | 0.65 | 1.82  |
| Coenzyme Q10              | 1,055 | 64  | 85 | 5  | 94.3 | 5.7  | 94.4  | 5.6  | 0.97 | 0.30 | 2.48  |
| Apple cider vinegar       | 1,038 | 81  | 83 | 7  | 92.8 | 7.2  | 92.2  | 7.8  | 1.08 | 0.41 | 2.43  |
| Coconut oil               | 1,033 | 86  | 84 | 6  | 92.3 | 7.7  | 93.3  | 6.7  | 0.86 | 0.30 | 2.03  |
| Echinacea                 | 1,028 | 91  | 83 | 7  | 91.9 | 8.1  | 92.2  | 7.8  | 0.95 | 0.36 | 2.14  |
| Immunglucan               | 1,058 | 61  | 86 | 4  | 94.5 | 5.5  | 95.6  | 4.4  | 0.81 | 0.21 | 2.25  |
| Lecithin                  | 1,087 | 32  | 89 | 1  | 97.1 | 2.9  | 98.9  | 1.1  | 0.38 | 0.01 | 2.34  |
| Dimethyl sulfone          | 1,114 | 5   | 90 | 0  | 99.6 | 0.4  | 100.0 |      |      |      |       |
| Chlorine dioxide          | 1,114 | 5   | 90 | 0  | 99.6 | 0.4  | 100.0 |      |      |      |       |
| Collagen                  | 997   | 122 | 83 | 7  | 89.1 | 10.9 | 92.2  | 7.8  | 0.69 | 0.26 | 1.53  |
| Green tea, matcha         | 928   | 191 | 73 | 17 | 82.9 | 17.1 | 81.1  | 18.9 | 1.13 | 0.61 | 1.99  |
| Chlorella                 | 1,066 | 53  | 84 | 6  | 95.3 | 4.7  | 93.3  | 6.7  | 1.44 | 0.49 | 3.47  |
| Ginseng                   | 1,081 | 38  | 88 | 2  | 96.6 | 3.4  | 97.8  | 2.2  | 0.65 | 0.07 | 2.58  |
| Rooibos                   | 998   | 121 | 87 | 3  | 89.2 | 10.8 | 96.7  | 3.3  | 0.28 | 0.06 | 0.88  |
| Suppl. for pregnant women | 1,072 | 47  | 88 | 2  | 95.8 | 4.2  | 97.8  | 2.2  | 0.52 | 0.06 | 2.04  |
| Sports supplements        | 1,072 | 47  | 87 | 3  | 95.8 | 4.2  | 96.7  | 3.3  | 0.79 | 0.15 | 2.52  |
| Weight loss supplements   | 1,109 | 10  | 89 | 1  | 99.1 | 0.9  | 98.9  | 1.1  | 1.25 | 0.03 | 8.94  |
| Yucca                     | 1,116 | 3   | 90 | 0  | 99.7 | 0.3  | 100.0 |      |      |      |       |
| Vilcacora                 | 1,113 | 6   | 90 | 0  | 99.5 | 0.5  | 100.0 |      |      |      |       |
| Lapacho                   | 1,111 | 8   | 88 | 2  | 99.3 | 0.7  | 97.8  | 2.2  | 3.15 | 0.32 | 16.12 |
| Chinese herbs             | 1,095 | 24  | 88 | 2  | 97.9 | 2.1  | 97.8  | 2.2  | 1.04 | 0.12 | 4.29  |
| Medical herbs             | 830   | 289 | 62 | 28 | 74.2 | 25.8 | 68.9  | 31.1 | 1.30 | 0.78 | 2.10  |
| Vironal                   | 1,103 | 16  | 88 | 2  | 98.6 | 1.4  | 97.8  | 2.2  | 1.57 | 0.17 | 6.83  |
| Melatonin                 | 1,079 | 40  | 84 | 6  | 96.4 | 3.6  | 93.3  | 6.7  | 1.93 | 0.65 | 4.75  |
| Cannabis                  | 1,065 | 54  | 86 | 4  | 95.2 | 4.8  | 95.6  | 4.4  | 0.92 | 0.24 | 2.58  |
| Aloe vera                 | 1,072 | 47  | 88 | 2  | 95.8 | 4.2  | 97.8  | 2.2  | 0.52 | 0.06 | 2.04  |
| Homeopathic               | 1,078 | 41  | 84 | 6  | 96.3 | 3.7  | 93.3  | 6.7  | 1.88 | 0.63 | 4.62  |
| Adaptogenic fungi         | 1,093 | 26  | 90 | 0  | 97.7 | 2.3  | 100.0 |      |      |      |       |
| Enzymes                   | 1,111 | 8   | 89 | 1  | 99.3 | 0.7  | 98.9  | 1.1  | 1.56 | 0.03 | 11.86 |
| Flavonoids                | 1,100 | 19  | 89 | 1  | 98.3 | 1.7  | 98.9  | 1.1  | 0.65 | 0.02 | 4.19  |
| Sea buckthorn             | 964   | 155 | 78 | 12 | 86.1 | 13.9 | 86.7  | 13.3 | 0.96 | 0.46 | 1.82  |
| Supplements other         | 993   | 126 | 80 | 10 | 88.7 | 11.3 | 88.9  | 11.1 | 0.99 | 0.44 | 1.97  |

94 The table shows the counts (columns 2–5) and corresponding percentages (columns 6–9) of subjects  
 95 who had not and those who had been exposed to factors listed in column 1 in subjects who were and

96 those who were not diagnosed with Covid-19, odds ratio (OR), and 95% confidence intervals for the  
 97 OR.

98 Table 2. Distributions of responses to the questions with ordinal scale in individuals who had and had  
 99 not been diagnosed with Covid-19.

|                           |                | 0     | 1     | 2     | 3     | 4     | 5    | 6     | 7     | 8    | 9    |
|---------------------------|----------------|-------|-------|-------|-------|-------|------|-------|-------|------|------|
| Hair darkness             | Covid-negat.   | 76    | 411   | 955   | 1,386 | 1,228 | 306  |       |       |      |      |
|                           | Covid-pozit.   | 15    | 72    | 170   | 220   | 177   | 40   |       |       |      |      |
| Hair redness              | Covid-negative | 2,589 | 608   | 212   | 153   | 49    | 18   |       |       |      |      |
|                           | Covid-pozitive | 433   | 100   | 34    | 17    | 8     | 1    |       |       |      |      |
| Skin darkness             | Covid-negative | 462   | 1,536 | 1,264 | 946   | 146   | 14   |       |       |      |      |
|                           | Covid-pozitive | 71    | 252   | 205   | 145   | 21    | 2    |       |       |      |      |
| Urbanisation              | Covid-negative | 608   | 625   | 913   | 381   | 485   | 102  | 1,337 |       |      |      |
|                           | Covid-pozitive | 100   | 91    | 171   | 67    | 83    | 15   | 182   |       |      |      |
| Members of household      | Covid-negative | 713   | 1,380 | 937   | 1,010 | 302   | 78   | 17    | 8     | 2    |      |
|                           | Covid-pozitive | 85    | 189   | 158   | 202   | 53    | 13   | 5     | 2     | 1    |      |
| Education                 | Covid-negative | 46    | 33    | 234   | 1,323 | 167   | 387  | 108   | 1,678 | 191  | 254  |
|                           | Covid-pozitive | 5     | 8     | 44    | 230   | 28    | 58   | 18    | 243   | 27   | 43   |
| Children aged <20         | Covid-negative | 2,198 | 838   | 1,053 | 256   | 48    | 10   | 1     | 1     | 0    |      |
|                           | Covid-pozitive | 301   | 169   | 177   | 37    | 13    | 2    | 2     | 1     | 1    |      |
| Children aged <10         | Covid-negative | 3,036 | 711   | 528   | 119   | 7     | 1    |       |       |      |      |
|                           | Covid-pozitive | 456   | 123   | 101   | 16    | 1     | 0    |       |       |      |      |
| Face mask use             | Covid-negative | 22    | 8     | 435   | 2,230 | 1,750 |      |       |       |      |      |
|                           | Covid-pozitive | 2     | 2     | 87    | 382   | 233   |      |       |       |      |      |
| Washing hands             | Covid-negative | 13    | 24    | 317   | 938   | 795   |      |       |       |      |      |
|                           | Covid-pozitive | 0     | 2     | 52    | 101   | 90    |      |       |       |      |      |
| Maintaining safe distance | Covid-negative | 22    | 19    | 468   | 1,002 | 583   |      |       |       |      |      |
|                           | Covid-pozitive | 2     | 2     | 62    | 114   | 65    |      |       |       |      |      |
|                           |                | 0     | 1     | 2     | 3     | 4     | 5    | 6     | 7     | 8    | 9    |
| Hair darkness             | Covid-negative | 1.74  | 9.42  | 21.89 | 31.77 | 28.15 | 7.02 |       |       |      |      |
|                           | Covid-pozitive | 2.16  | 10.37 | 24.50 | 31.70 | 25.50 | 5.76 |       |       |      |      |
| Hair redness              | Covid-negative | 71.34 | 16.75 | 5.84  | 4.22  | 1.35  | 0.50 |       |       |      |      |
|                           | Covid-pozitive | 73.02 | 16.86 | 5.73  | 2.87  | 1.35  | 0.17 |       |       |      |      |
| Skin darkness             | Covid-negative | 10.58 | 35.16 | 28.94 | 21.66 | 3.34  | 0.32 |       |       |      |      |
|                           | Covid-pozitive | 10.20 | 36.21 | 29.45 | 20.83 | 3.02  | 0.29 |       |       |      |      |
| Urbanisation              | Covid-negative | 13.66 | 14.04 | 20.51 | 8.56  | 10.90 | 2.29 | 30.04 |       |      |      |
|                           | Covid-pozitive | 14.10 | 12.83 | 24.12 | 9.45  | 11.71 | 2.12 | 25.67 |       |      |      |
| Members of household      | Covid-negative | 16.03 | 31.03 | 21.07 | 22.71 | 6.79  | 1.75 | 0.38  | 0.18  | 0.04 |      |
|                           | Covid-pozitive | 12.01 | 26.69 | 22.32 | 28.53 | 7.49  | 1.84 | 0.71  | 0.28  | 0.14 |      |
| Education                 | Covid-negative | 1.04  | 0.75  | 5.29  | 29.93 | 3.78  | 8.75 | 2.44  | 37.96 | 4.32 | 5.75 |
|                           | Covid-pozitive | 0.71  | 1.14  | 6.25  | 32.67 | 3.98  | 8.24 | 2.56  | 34.52 | 3.84 | 6.11 |
| Children aged <20         | Covid-negative | 49.90 | 19.02 | 23.90 | 5.81  | 1.09  | 0.23 | 0.02  | 0.02  | 0.00 |      |
|                           | Covid-pozitive | 42.82 | 24.04 | 25.18 | 5.26  | 1.85  | 0.28 | 0.28  | 0.14  | 0.14 |      |

|                           |                |       |       |       |       |       |      |
|---------------------------|----------------|-------|-------|-------|-------|-------|------|
| Children aged <10         | Covid-negative | 68.97 | 16.15 | 11.99 | 2.70  | 0.16  | 0.02 |
|                           | Covid-pozitive | 65.42 | 17.65 | 14.49 | 2.30  | 0.14  | 0.00 |
| Face mask use             | Covid-negative | 0.49  | 0.18  | 9.79  | 50.17 | 39.37 |      |
|                           | Covid-pozitive | 0.28  | 0.28  | 12.32 | 54.11 | 33.00 |      |
| Washing hands             | Covid-negative | 0.62  | 1.15  | 15.19 | 44.94 | 38.09 |      |
|                           | Covid-pozitive | 0.00  | 0.82  | 21.22 | 41.22 | 36.73 |      |
| Maintaining safe distance | Covid-negative | 1.05  | 0.91  | 22.35 | 47.85 | 27.84 |      |
|                           | Covid-pozitive | 0.82  | 0.82  | 25.31 | 46.53 | 26.53 |      |

100

101 *The first part of the table shows the numbers of subjects providing a particular response; the second*  
 102 *shows the corresponding percentages. For the meaning of particular response codes, see Material*  
 103 *and Methods.*

104 To detect which biological, socioeconomic, behavioural, and environmental factors had a positive or  
 105 negative effect on the risk of SARS-CoV-2 infection and risk of a severe course of Covid-19, we used  
 106 separate partial Kendall correlation tests controlled for age, sex, and urbanisation level with 105  
 107 factors as independent factors, and variables infection with SARS-CoV-2 (yes/no), course of the  
 108 Covid-19 infection (ordinal), severity of symptoms index (continuous), length of infection, and  
 109 physical and mental health indices (continuous) as dependent variables. When age, sex, or  
 110 urbanisation level was the subject of the analysis, only the other two remaining covariates were  
 111 controlled for. Results of the analyses is shown in Table 3; results of analogical tests performed  
 112 separately for each sex are displayed in Table 4.

113 Table 3. The effect of 105 factors on the risk of SARS-CoV-2 infection, Covid-19 course severity, and  
 114 physical and mental health after the end of fourth wave of Covid-19

115

|                     | Partial Kendall Tau |              |             |             |                  |                | p-value  |        |          |        |                  |                |
|---------------------|---------------------|--------------|-------------|-------------|------------------|----------------|----------|--------|----------|--------|------------------|----------------|
|                     | Infected            | Course       | Symptoms    | Length      | Physical illness | Mental illness | Infected | Course | Symptoms | Length | Physical illness | Mental illness |
|                     | N/A                 | N/A          | N/A         | N/A         | <b>0.25</b>      | <b>0.04</b>    | N/A      | N/A    | N/A      | N/A    | 0.000            | 0.000          |
| Sex (being a woman) | <b>-0.02</b>        | 0.02         | <b>0.17</b> | 0.04        | <b>0.09</b>      | <b>0.11</b>    | 0.052    | 0.472  | 0.000    | 0.120  | 0.000            | 0.000          |
| Age                 | <b>-0.04</b>        | <b>0.15</b>  | 0.01        | <b>0.11</b> | <b>-0.04</b>     | <b>-0.08</b>   | 0.000    | 0.000  | 0.731    | 0.000  | 0.000            | 0.000          |
| Body height         | <b>0.02</b>         | -0.01        | -0.01       | -0.01       | 0.00             | <b>-0.02</b>   | 0.022    | 0.800  | 0.644    | 0.820  | 0.808            | 0.074          |
| Body weight         | <b>0.02</b>         | 0.05         | 0.03        | <b>0.10</b> | <b>0.07</b>      | 0.01           | 0.022    | 0.076  | 0.300    | 0.000  | 0.000            | 0.530          |
| BMI                 | 0.01                | <b>0.06</b>  | 0.04        | <b>0.12</b> | <b>0.08</b>      | 0.01           | 0.211    | 0.023  | 0.114    | 0.000  | 0.000            | 0.233          |
| Hair darkness       | <b>-0.03</b>        | <b>-0.05</b> | -0.04       | -0.02       | <b>-0.02</b>     | 0.00           | 0.001    | 0.061  | 0.112    | 0.490  | 0.027            | 0.811          |
| Hair redness        | -0.02               | -0.02        | 0.02        | 0.04        | <b>0.03</b>      | 0.01           | 0.141    | 0.549  | 0.385    | 0.217  | 0.001            | 0.148          |
| Skin darkness       | 0.00                | <b>-0.07</b> | -0.04       | -0.01       | <b>-0.05</b>     | <b>-0.04</b>   | 0.699    | 0.006  | 0.137    | 0.604  | 0.000            | 0.000          |
| Blood group A       | 0.00                | -0.03        | 0.01        | -0.04       | 0.00             | -0.01          | 0.823    | 0.276  | 0.774    | 0.180  | 0.727            | 0.519          |
| Blood group B       | <b>0.03</b>         | 0.05         | -0.02       | 0.01        | 0.00             | -0.01          | 0.004    | 0.115  | 0.424    | 0.835  | 0.804            | 0.512          |
| Blood group AB      | 0.00                | 0.02         | 0.03        | 0.01        | 0.00             | 0.01           | 0.761    | 0.473  | 0.298    | 0.633  | 0.860            | 0.567          |



|                                       |              |              |              |              |              |              |       |       |       |       |       |       |
|---------------------------------------|--------------|--------------|--------------|--------------|--------------|--------------|-------|-------|-------|-------|-------|-------|
| Blood group 0                         | <b>-0.02</b> | -0.02        | -0.01        | 0.03         | -0.01        | 0.01         | 0.040 | 0.466 | 0.849 | 0.359 | 0.502 | 0.383 |
| Rh-positivity                         | 0.01         | 0.03         | 0.05         | 0.02         | 0.00         | <b>-0.02</b> | 0.382 | 0.331 | 0.125 | 0.434 | 0.665 | 0.048 |
| Rh-heterozygosity                     | -0.01        | 0.00         | 0.05         | -0.02        | 0.01         | -0.03        | 0.730 | 0.949 | 0.438 | 0.712 | 0.628 | 0.098 |
| Urbanisation                          | <b>-0.02</b> | 0.00         | 0.02         | -0.02        | 0.01         | <b>0.04</b>  | 0.020 | 0.987 | 0.384 | 0.472 | 0.408 | 0.000 |
| Members of household                  | <b>0.05</b>  | <b>-0.05</b> | -0.05        | -0.06        | 0.00         | <b>-0.04</b> | 0.000 | 0.033 | 0.039 | 0.025 | 0.973 | 0.000 |
| Living single                         | <b>-0.03</b> | -0.01        | -0.05        | -0.04        | 0.00         | <b>0.05</b>  | 0.000 | 0.765 | 0.066 | 0.098 | 0.770 | 0.000 |
| Education                             | <b>-0.02</b> | <b>-0.05</b> | <b>-0.08</b> | <b>-0.09</b> | <b>-0.05</b> | <b>-0.07</b> | 0.018 | 0.032 | 0.001 | 0.001 | 0.000 | 0.000 |
| Family income                         | 0.01         | -0.01        | -0.04        | -0.03        | <b>-0.05</b> | <b>-0.07</b> | 0.283 | 0.599 | 0.144 | 0.291 | 0.000 | 0.000 |
| Children aged <20                     | <b>0.03</b>  | <b>-0.08</b> | <b>-0.02</b> | -0.04        | <b>-0.02</b> | <b>-0.04</b> | 0.001 | 0.003 | 0.434 | 0.154 | 0.043 | 0.000 |
| Children aged <10                     | 0.02         | <b>-0.11</b> | -0.05        | -0.04        | <b>-0.02</b> | <b>-0.05</b> | 0.081 | 0.000 | 0.036 | 0.145 | 0.024 | 0.000 |
| Face mask use                         | <b>-0.04</b> | <b>0.11</b>  | 0.05         | 0.01         | 0.00         | <b>0.02</b>  | 0.000 | 0.000 | 0.053 | 0.719 | 0.595 | 0.048 |
| Washing hands                         | -0.02        | 0.02         | -0.03        | -0.01        | -0.01        | 0.02         | 0.223 | 0.645 | 0.563 | 0.797 | 0.385 | 0.277 |
| Maintaining safe distance             | -0.01        | <b>0.10</b>  | -0.01        | 0.09         | 0.00         | 0.01         | 0.400 | 0.022 | 0.751 | 0.054 | 0.796 | 0.315 |
| Wearing glasses                       | 0.00         | 0.04         | 0.02         | -0.01        | 0.01         | <b>0.04</b>  | 0.736 | 0.286 | 0.569 | 0.865 | 0.256 | 0.001 |
| Tobacco smoking                       | <b>-0.03</b> | <b>-0.06</b> | 0.03         | 0.02         | 0.00         | <b>0.04</b>  | 0.001 | 0.040 | 0.330 | 0.444 | 0.668 | 0.001 |
| Marihuana consumption                 | -0.02        | <b>-0.08</b> | 0.01         | -0.04        | -0.01        | <b>0.04</b>  | 0.097 | 0.013 | 0.753 | 0.192 | 0.182 | 0.000 |
| Daily alcohol consumption             | -0.01        | -0.02        | 0.00         | -0.03        | -0.01        | <b>0.02</b>  | 0.628 | 0.604 | 0.920 | 0.416 | 0.362 | 0.079 |
| Snoring                               | 0.00         | -0.02        | 0.03         | <b>0.09</b>  | <b>0.06</b>  | <b>0.04</b>  | 0.973 | 0.517 | 0.407 | 0.004 | 0.000 | 0.000 |
| Frequent singing                      | <b>0.03</b>  | -0.03        | <b>0.10</b>  | <b>0.09</b>  | 0.01         | <b>-0.02</b> | 0.019 | 0.279 | 0.001 | 0.006 | 0.235 | 0.044 |
| Sport                                 | <b>0.03</b>  | <b>-0.09</b> | -0.05        | <b>-0.08</b> | <b>-0.08</b> | <b>-0.05</b> | 0.003 | 0.004 | 0.087 | 0.010 | 0.000 | 0.000 |
| Cold water swimming                   | <b>0.04</b>  | 0.04         | 0.00         | -0.01        | <b>-0.06</b> | <b>-0.04</b> | 0.000 | 0.192 | 0.978 | 0.822 | 0.000 | 0.001 |
| Vitamins and supplements              | <b>-0.03</b> | 0.02         | 0.01         | 0.02         | 0.01         | 0.01         | 0.003 | 0.601 | 0.811 | 0.580 | 0.270 | 0.170 |
| Volunteering                          | 0.01         | 0.03         | 0.02         | 0.01         | -0.01        | 0.00         | 0.568 | 0.269 | 0.410 | 0.804 | 0.362 | 0.804 |
| Walking in nature                     | -0.02        | -0.04        | 0.02         | -0.07        | <b>-0.12</b> | <b>-0.08</b> | 0.135 | 0.351 | 0.653 | 0.160 | 0.000 | 0.000 |
| Frequent use of sauna                 | -0.01        | <b>-0.12</b> | -0.06        | 0.07         | <b>-0.05</b> | -0.02        | 0.324 | 0.006 | 0.157 | 0.147 | 0.000 | 0.225 |
| Dog                                   | 0.01         | <b>0.07</b>  | 0.05         | 0.05         | <b>0.03</b>  | 0.01         | 0.434 | 0.010 | 0.055 | 0.079 | 0.000 | 0.303 |
| Cat                                   | 0.01         | 0.01         | 0.04         | <b>0.08</b>  | <b>0.04</b>  | <b>0.04</b>  | 0.473 | 0.586 | 0.115 | 0.003 | 0.000 | 0.000 |
| Bird                                  | 0.00         | -0.01        | 0.02         | <b>-0.06</b> | <b>0.03</b>  | 0.00         | 0.728 | 0.837 | 0.530 | 0.032 | 0.005 | 0.637 |
| Reptile                               | 0.02         | <b>-0.06</b> | -0.06        | <b>-0.09</b> | 0.00         | 0.01         | 0.067 | 0.011 | 0.020 | 0.001 | 0.741 | 0.551 |
| Fish                                  | -0.01        | -0.02        | 0.04         | 0.00         | <b>0.02</b>  | 0.00         | 0.277 | 0.342 | 0.096 | 0.959 | 0.020 | 0.685 |
| Rabbit                                | 0.01         | 0.03         | 0.01         | 0.03         | 0.01         | <b>0.02</b>  | 0.419 | 0.312 | 0.709 | 0.211 | 0.368 | 0.039 |
| Guinea pigs, hamster                  | 0.02         | -0.02        | 0.01         | 0.01         | <b>0.03</b>  | <b>0.04</b>  | 0.065 | 0.489 | 0.693 | 0.603 | 0.000 | 0.000 |
| Fowls                                 | 0.00         | 0.02         | -0.02        | 0.02         | <b>0.02</b>  | -0.01        | 0.966 | 0.463 | 0.548 | 0.414 | 0.080 | 0.455 |
| Goats, sheep                          | <b>-0.02</b> | 0.04         | 0.01         | 0.01         | 0.01         | 0.00         | 0.053 | 0.167 | 0.624 | 0.616 | 0.305 | 0.619 |
| Mouse, rat                            | <b>0.03</b>  | -0.04        | 0.00         | 0.01         | <b>0.03</b>  | 0.01         | 0.010 | 0.168 | 0.919 | 0.660 | 0.002 | 0.219 |
| Pig                                   | 0.00         | -0.03        | -0.04        | 0.02         | 0.01         | -0.02        | 0.780 | 0.344 | 0.177 | 0.497 | 0.381 | 0.151 |
| Horse                                 | 0.02         | 0.00         | 0.02         | -0.01        | <b>0.02</b>  | -0.01        | 0.108 | 0.944 | 0.523 | 0.717 | 0.054 | 0.619 |
| Being overweight                      | 0.01         | 0.05         | <b>0.09</b>  | <b>0.10</b>  | <b>0.04</b>  | 0.00         | 0.524 | 0.128 | 0.002 | 0.002 | 0.001 | 0.725 |
| Being obese                           |              |              |              |              |              |              |       |       |       |       |       |       |
| BMI>30                                | 0.01         | 0.04         | 0.00         | <b>0.09</b>  | <b>0.10</b>  | <b>0.02</b>  | 0.120 | 0.118 | 0.859 | 0.001 | 0.000 | 0.079 |
| Being underweight                     | 0.00         | 0.01         | -0.01        | <b>-0.06</b> | 0.00         | <b>0.02</b>  | 0.782 | 0.742 | 0.598 | 0.030 | 0.884 | 0.026 |
| Diabetes                              | -0.01        | <b>0.09</b>  | 0.04         | -0.01        | <b>0.09</b>  | 0.01         | 0.237 | 0.004 | 0.239 | 0.774 | 0.000 | 0.581 |
| Cardiovascular problems               | -0.01        | <b>0.06</b>  | 0.07         | 0.04         | <b>0.11</b>  | <b>0.04</b>  | 0.262 | 0.052 | 0.022 | 0.168 | 0.000 | 0.000 |
| Asthma                                | 0.00         | <b>0.11</b>  | 0.07         | 0.01         | <b>0.16</b>  | <b>0.06</b>  | 0.973 | 0.000 | 0.023 | 0.650 | 0.000 | 0.000 |
| Chronic obstructive pulmonary disease | <b>-0.02</b> | <b>0.12</b>  | <b>0.10</b>  | <b>0.07</b>  | <b>0.06</b>  | <b>0.04</b>  | 0.044 | 0.000 | 0.001 | 0.030 | 0.000 | 0.001 |

|                     |              |              |             |             |              |              |       |       |       |       |       |       |
|---------------------|--------------|--------------|-------------|-------------|--------------|--------------|-------|-------|-------|-------|-------|-------|
| Immunodeficiency    | -0.02        | <b>0.11</b>  | <b>0.11</b> | <b>0.14</b> | <b>0.14</b>  | <b>0.09</b>  | 0.130 | 0.000 | 0.000 | 0.000 | 0.000 | 0.000 |
| Allergy             | 0.01         | <b>0.06</b>  | 0.06        | <b>0.07</b> | <b>0.15</b>  | <b>0.03</b>  | 0.533 | 0.067 | 0.065 | 0.030 | 0.000 | 0.012 |
| Autoimmunity        | 0.02         | <b>0.10</b>  | 0.07        | 0.01        | <b>0.08</b>  | 0.01         | 0.116 | 0.027 | 0.089 | 0.773 | 0.000 | 0.291 |
| Toxoplasmosis       | 0.00         | 0.01         | -0.06       | -0.10       | 0.02         | 0.03         | 0.992 | 0.877 | 0.323 | 0.116 | 0.355 | 0.160 |
| Borreliosis         | <b>-0.07</b> | -0.01        | -0.02       | -0.08       | 0.02         | <b>0.04</b>  | 0.000 | 0.853 | 0.670 | 0.085 | 0.313 | 0.015 |
| Depression          | 0.00         | <b>0.07</b>  | 0.04        | 0.02        | <b>0.14</b>  | <b>0.34</b>  | 0.841 | 0.025 | 0.190 | 0.452 | 0.000 | 0.000 |
| Anxiety             | <b>0.03</b>  | <b>0.07</b>  | <b>0.08</b> | -0.04       | <b>0.17</b>  | <b>0.42</b>  | 0.003 | 0.025 | 0.011 | 0.186 | 0.000 | 0.000 |
| Vitamin A           | -0.01        | <b>-0.14</b> | -0.01       | 0.04        | 0.00         | 0.01         | 0.754 | 0.061 | 0.894 | 0.634 | 0.864 | 0.790 |
| Vitamin B           | 0.01         | -0.06        | 0.04        | -0.04       | <b>0.04</b>  | 0.01         | 0.556 | 0.394 | 0.538 | 0.591 | 0.049 | 0.628 |
| Vitamin C           | 0.02         | 0.01         | 0.07        | 0.03        | <b>0.04</b>  | 0.00         | 0.252 | 0.901 | 0.366 | 0.717 | 0.037 | 0.825 |
| Vitamin D           | <b>-0.06</b> | -0.03        | 0.00        | -0.12       | 0.01         | 0.00         | 0.002 | 0.705 | 0.979 | 0.125 | 0.482 | 0.920 |
| Vitamin E           | -0.02        | -0.06        | 0.02        | -0.06       | 0.00         | 0.01         | 0.278 | 0.444 | 0.771 | 0.453 | 0.884 | 0.615 |
| Vitamin K           | -0.01        | -0.02        | 0.13        | -0.01       | -0.03        | <b>-0.05</b> | 0.784 | 0.803 | 0.075 | 0.931 | 0.115 | 0.011 |
| Magnesium           | 0.00         | 0.09         | 0.04        | 0.00        | 0.01         | 0.02         | 0.934 | 0.206 | 0.618 | 0.971 | 0.487 | 0.340 |
| Zinc                | -0.03        | -0.01        | 0.00        | -0.06       | 0.00         | 0.02         | 0.099 | 0.862 | 0.969 | 0.455 | 0.892 | 0.268 |
| Selenium fluoride   |              |              |             |             |              |              |       |       |       |       |       |       |
| iodine              | 0.00         | -0.08        | -0.07       | -0.10       | 0.02         | -0.02        | 0.908 | 0.257 | 0.322 | 0.206 | 0.343 | 0.374 |
| Calcium             | -0.02        | -0.08        | 0.06        | -0.13       | 0.01         | 0.01         | 0.409 | 0.294 | 0.389 | 0.096 | 0.694 | 0.523 |
| Iron                | -0.03        | -0.09        | 0.03        | -0.13       | 0.02         | -0.03        | 0.154 | 0.238 | 0.697 | 0.100 | 0.255 | 0.156 |
| Antioxidants        | 0.02         | 0.09         | 0.01        | 0.04        | -0.02        | 0.02         | 0.319 | 0.209 | 0.941 | 0.589 | 0.205 | 0.382 |
| Fatty acids         | 0.01         | 0.05         | 0.02        | -0.16       | 0.02         | 0.03         | 0.599 | 0.508 | 0.834 | 0.045 | 0.421 | 0.083 |
| Coenzyme Q10        | 0.00         | -0.05        | -0.03       | -0.13       | 0.03         | 0.03         | 0.891 | 0.492 | 0.685 | 0.119 | 0.131 | 0.100 |
| Apple cider vinegar | 0.01         | 0.04         | 0.07        | 0.02        | -0.02        | 0.01         | 0.696 | 0.585 | 0.307 | 0.831 | 0.273 | 0.757 |
| Coconut oil         | -0.01        | 0.11         | 0.09        | 0.06        | -0.01        | -0.02        | 0.636 | 0.145 | 0.230 | 0.470 | 0.545 | 0.205 |
| Echinacea           | 0.00         | <b>0.23</b>  | 0.00        | 0.06        | 0.00         | 0.03         | 0.855 | 0.002 | 0.961 | 0.437 | 0.974 | 0.095 |
| Immunglucan         | -0.01        | 0.07         | -0.08       | -0.14       | 0.02         | <b>0.04</b>  | 0.545 | 0.326 | 0.296 | 0.080 | 0.197 | 0.029 |
| Lecithin            | -0.03        | -0.01        | 0.14        | 0.05        | -0.03        | -0.02        | 0.162 | 0.885 | 0.056 | 0.497 | 0.181 | 0.388 |
| Dimethyl sulfone    | -0.02        | N/A          | N/A         | N/A         | 0.01         | -0.03        | 0.326 | N/A   | N/A   | N/A   | 0.591 | 0.088 |
| Chlorine dioxide    | -0.02        | N/A          | N/A         | N/A         | 0.02         | -0.02        | 0.369 | N/A   | N/A   | N/A   | 0.422 | 0.355 |
| Collagen            | -0.03        | 0.04         | -0.04       | -0.03       | -0.02        | 0.00         | 0.175 | 0.546 | 0.555 | 0.679 | 0.408 | 0.846 |
| Green tea, matcha   | 0.01         | 0.12         | 0.19        | 0.00        | 0.00         | <b>0.06</b>  | 0.483 | 0.096 | 0.009 | 0.956 | 0.967 | 0.001 |
| Chlorella           | 0.02         | <b>0.17</b>  | 0.07        | -0.02       | -0.02        | 0.01         | 0.236 | 0.023 | 0.313 | 0.773 | 0.296 | 0.469 |
| Ginseng             | -0.02        | 0.00         | -0.05       | -0.14       | <b>0.05</b>  | 0.03         | 0.400 | 0.958 | 0.500 | 0.092 | 0.008 | 0.129 |
| Rooibos             | <b>-0.07</b> | <b>0.14</b>  | 0.00        | -0.01       | <b>-0.05</b> | -0.02        | 0.001 | 0.057 | 0.975 | 0.942 | 0.015 | 0.239 |
| Suppl. for pregnant | -0.03        | -0.07        | -0.09       | 0.16        | 0.00         | <b>-0.05</b> | 0.124 | 0.334 | 0.227 | 0.043 | 0.855 | 0.009 |
| Sports suppl.       | -0.01        | <b>0.22</b>  | 0.06        | -0.07       | -0.01        | -0.01        | 0.566 | 0.002 | 0.432 | 0.398 | 0.734 | 0.536 |
| Weight loss suppl.  | 0.01         | 0.13         | 0.14        | 0.09        | -0.01        | 0.00         | 0.710 | 0.081 | 0.050 | 0.249 | 0.560 | 0.910 |
| Yucca               | -0.01        | N/A          | N/A         | N/A         | 0.01         | <b>0.04</b>  | 0.458 | N/A   | N/A   | N/A   | 0.533 | 0.038 |
| Vilcacora           | -0.02        | N/A          | N/A         | N/A         | -0.03        | 0.00         | 0.268 | N/A   | N/A   | N/A   | 0.090 | 0.937 |
| Lapacho             | <b>0.04</b>  | 0.10         | 0.10        | -0.05       | -0.03        | -0.02        | 0.026 | 0.183 | 0.186 | 0.532 | 0.133 | 0.279 |
| Chinese herbs       | 0.00         | 0.09         | 0.01        | 0.14        | <b>0.04</b>  | 0.03         | 0.961 | 0.214 | 0.896 | 0.075 | 0.037 | 0.106 |
| Medical herbs       | 0.03         | 0.10         | 0.09        | 0.07        | 0.02         | 0.01         | 0.111 | 0.196 | 0.216 | 0.360 | 0.268 | 0.508 |
| Vironal             | 0.02         | <b>0.17</b>  | -0.05       | 0.07        | 0.03         | -0.03        | 0.371 | 0.022 | 0.533 | 0.381 | 0.127 | 0.121 |
| Melatonin           | <b>0.04</b>  | <b>0.14</b>  | 0.06        | 0.03        | <b>0.06</b>  | <b>0.08</b>  | 0.020 | 0.059 | 0.408 | 0.715 | 0.003 | 0.000 |
| Cannabis            | 0.00         | <b>0.19</b>  | 0.09        | -0.02       | 0.00         | 0.03         | 0.864 | 0.010 | 0.218 | 0.762 | 0.988 | 0.107 |
| Aloe vera           | -0.03        | <b>0.18</b>  | 0.00        | 0.09        | -0.01        | -0.01        | 0.178 | 0.018 | 0.989 | 0.267 | 0.658 | 0.624 |
| Homeopathics        | <b>0.04</b>  | 0.09         | 0.09        | 0.02        | 0.03         | <b>0.07</b>  | 0.044 | 0.218 | 0.220 | 0.845 | 0.084 | 0.000 |
| Adaptogenic fungi   | <b>-0.04</b> | N/A          | N/A         | N/A         | 0.02         | 0.01         | 0.030 | N/A   | N/A   | N/A   | 0.256 | 0.669 |
| Enzymes             | 0.01         | 0.11         | 0.00        | 0.05        | 0.00         | 0.01         | 0.457 | 0.127 | 0.995 | 0.501 | 0.875 | 0.456 |
| Flavonoids          | -0.01        | 0.12         | -0.04       | 0.05        | 0.01         | 0.02         | 0.596 | 0.100 | 0.596 | 0.499 | 0.620 | 0.257 |
| Sea buckthorn       | -0.01        | <b>0.18</b>  | 0.06        | -0.02       | -0.02        | -0.03        | 0.776 | 0.015 | 0.446 | 0.795 | 0.269 | 0.181 |
| Supplements other   | 0.00         | -0.06        | -0.16       | -0.11       | <b>-0.04</b> | -0.02        | 0.977 | 0.446 | 0.027 | 0.168 | 0.032 | 0.417 |
| Number of           | 23.2         | 28           | 6.4         | 13.6        | 34.4         | 34.4         |       |       |       |       |       |       |

significant results

116

117 Columns 2–7 show the direction and strength (partial Kendall Tau) and columns 8–13 statistical  
 118 significance of effects of the factors listed in the first column on the risk of Covid-19 infection (col. 2,  
 119 8), the course of Covid-19 (col. 3, 9), the severity of symptoms index (col. 4, 10), length of Covid-19  
 120 disease (col. 5, 11), and health after the fourth wave of Covid-19 – indices of physical and mental  
 121 illness (col. 6–7 and 12–13). Positive Tau means a positive association between the factor in the first  
 122 column and the dependent variable listed in the heading of the column. Taus printed in bold indicate  
 123 associations which are significant after correction for multiple tests with the Benjamini-Hochberg  
 124 procedure with false discovery rate 0.20 (20% of significant results in each column are false  
 125 discoveries – artifacts of multiple tests). The number of significant results (without the 20% of false  
 126 significant results) is shown in the last row. N/A means not available (cannot be tested), p-values  
 127 under 0.0005 were coded as 0.000.

128 Table 4. Effect of various factors on the risk of SARS-CoV-2 infection, severity of course of Covid-19,  
 129 and post-Covid physical and mental health in women and men after the end of fourth wave of Covid-  
 130 19

|                      | Women        |              |              |              |                  |                | Men          |             |              |              |                  |                |
|----------------------|--------------|--------------|--------------|--------------|------------------|----------------|--------------|-------------|--------------|--------------|------------------|----------------|
|                      | Infected     | Course       | Symptoms     | Length       | Physical illness | Mental illness | Infected     | Course      | Symptoms     | Length       | Physical illness | Mental illness |
|                      | N/A          | N/A          | N/A          | N/A          | <b>0.27</b>      | <b>0.06</b>    | N/A          | N/A         | N/A          | N/A          | <b>0.23</b>      | 0.00           |
| Age                  | -0.04        | <b>0.15</b>  | 0.03         | <b>0.12</b>  | <b>-0.05</b>     | <b>-0.06</b>   | -0.02        | <b>0.15</b> | -0.03        | 0.09         | <b>-0.03</b>     | <b>-0.13</b>   |
| Body height          | 0.01         | 0.01         | -0.01        | 0.00         | -0.01            | <b>-0.02</b>   | <b>0.05</b>  | -0.03       | -0.01        | -0.04        | 0.00             | -0.01          |
| Body weight          | 0.01         | <b>0.08</b>  | 0.03         | <b>0.13</b>  | <b>0.08</b>      | 0.01           | <b>0.04</b>  | 0.01        | 0.04         | 0.09         | <b>0.05</b>      | -0.01          |
| BMI                  | 0.01         | <b>0.08</b>  | 0.04         | <b>0.13</b>  | <b>0.08</b>      | <b>0.02</b>    | 0.01         | 0.03        | 0.04         | <b>0.12</b>  | <b>0.06</b>      | -0.01          |
| Hair darkness        | -0.04        | <b>-0.07</b> | -0.07        | -0.05        | <b>-0.03</b>     | -0.01          | -0.01        | -0.01       | 0.00         | 0.03         | -0.01            | 0.01           |
| Hair redness         | -0.01        | 0.00         | 0.03         | 0.04         | <b>0.03</b>      | 0.01           | -0.02        | -0.05       | 0.01         | 0.03         | <b>0.05</b>      | 0.03           |
| Skin darkness        | -0.01        | <b>-0.09</b> | -0.05        | -0.03        | <b>-0.07</b>     | <b>-0.05</b>   | 0.01         | -0.03       | -0.03        | 0.02         | -0.02            | -0.02          |
| Blood group A        | 0.00         | -0.03        | 0.01         | -0.03        | 0.00             | -0.02          | -0.01        | -0.03       | 0.01         | -0.06        | 0.01             | 0.02           |
| Blood group B        | 0.02         | <b>0.08</b>  | -0.01        | 0.01         | -0.01            | -0.01          | <b>0.06</b>  | -0.04       | -0.06        | -0.02        | <b>0.04</b>      | 0.00           |
| Blood group AB       | 0.00         | 0.02         | 0.06         | 0.04         | 0.00             | 0.01           | -0.01        | 0.02        | -0.05        | -0.05        | 0.01             | -0.01          |
| Blood group O        | -0.01        | -0.06        | -0.03        | 0.00         | 0.01             | 0.02           | -0.04        | 0.07        | 0.08         | 0.12         | <b>-0.05</b>     | -0.02          |
| Rh-positivity        | 0.02         | 0.05         | 0.03         | 0.02         | -0.01            | -0.02          | -0.03        | 0.01        | 0.12         | 0.06         | 0.00             | -0.03          |
| Rh-heterozygosity    | -0.01        | 0.07         | 0.08         | 0.01         | 0.00             | -0.02          | 0.00         | -0.10       | -0.05        | -0.10        | 0.03             | -0.08          |
| Urbanisation         | -0.02        | -0.05        | -0.01        | -0.06        | 0.01             | <b>0.04</b>    | -0.03        | 0.08        | 0.08         | 0.06         | 0.01             | <b>0.05</b>    |
| Members of household | <b>0.05</b>  | <b>-0.10</b> | <b>-0.10</b> | <b>-0.11</b> | -0.01            | <b>-0.04</b>   | 0.04         | 0.04        | 0.06         | 0.03         | 0.02             | -0.03          |
| Living single        | <b>-0.04</b> | 0.02         | -0.02        | 0.00         | 0.02             | <b>0.06</b>    | -0.03        | -0.05       | <b>-0.11</b> | <b>-0.12</b> | <b>-0.03</b>     | <b>0.04</b>    |
| Education            | <b>-0.03</b> | <b>-0.11</b> | -0.07        | -0.07        | <b>-0.06</b>     | <b>-0.07</b>   | 0.00         | 0.02        | <b>-0.11</b> | <b>-0.12</b> | <b>-0.05</b>     | <b>-0.05</b>   |
| Family income        | 0.00         | -0.03        | -0.04        | -0.04        | <b>-0.06</b>     | <b>-0.07</b>   | 0.03         | 0.02        | -0.03        | -0.01        | <b>-0.04</b>     | <b>-0.07</b>   |
| Children aged <20    | 0.02         | <b>-0.11</b> | -0.04        | -0.06        | <b>-0.02</b>     | <b>-0.04</b>   | <b>0.04</b>  | -0.01       | 0.03         | 0.01         | -0.01            | <b>-0.04</b>   |
| Children aged <10    | 0.01         | <b>-0.13</b> | <b>-0.10</b> | -0.06        | <b>-0.03</b>     | <b>-0.04</b>   | 0.03         | -0.07       | 0.03         | 0.00         | -0.01            | <b>-0.04</b>   |
| Face mask use        | <b>-0.03</b> | <b>0.11</b>  | 0.05         | 0.05         | 0.01             | 0.01           | <b>-0.06</b> | <b>0.11</b> | 0.06         | -0.07        | -0.01            | 0.03           |
| Washing hands        | -0.01        | 0.00         | 0.00         | -0.04        | 0.00             | 0.02           | -0.05        | 0.06        | -0.07        | 0.04         | -0.03            | 0.00           |
| Maintaining safe     | 0.00         | <b>0.13</b>  | 0.05         | <b>0.13</b>  | 0.02             | 0.02           | -0.05        | 0.03        | -0.14        | -0.04        | -0.03            | -0.02          |

|                                       |              |              |             |              |              |              |              |              |             |              |              |              |
|---------------------------------------|--------------|--------------|-------------|--------------|--------------|--------------|--------------|--------------|-------------|--------------|--------------|--------------|
| distance                              |              |              |             |              |              |              |              |              |             |              |              |              |
| Wearing glasses                       | 0.01         | 0.04         | 0.02        | 0.04         | 0.02         | <b>0.05</b>  | -0.01        | 0.02         | 0.00        | -0.13        | -0.01        | 0.01         |
| Tobacco smoking                       | <b>-0.03</b> | -0.03        | 0.05        | 0.04         | 0.02         | <b>0.04</b>  | <b>-0.05</b> | -0.13        | -0.01       | -0.01        | <b>-0.05</b> | 0.02         |
| Marihuana consumption                 | -0.03        | <b>-0.08</b> | -0.07       | -0.04        | -0.02        | <b>0.04</b>  | -0.01        | -0.08        | 0.06        | -0.06        | -0.01        | <b>0.05</b>  |
| Daily alcohol consumption             | -0.02        | 0.00         | 0.01        | -0.03        | -0.02        | <b>0.03</b>  | 0.02         | -0.03        | 0.00        | -0.02        | 0.00         | 0.01         |
| Snoring                               | 0.01         | 0.04         | 0.04        | <b>0.14</b>  | <b>0.07</b>  | <b>0.06</b>  | -0.02        | -0.10        | 0.02        | 0.02         | <b>0.04</b>  | 0.03         |
| Frequent singing                      | 0.01         | -0.02        | <b>0.12</b> | <b>0.11</b>  | -0.01        | <b>-0.04</b> | <b>0.06</b>  | -0.06        | 0.06        | 0.05         | <b>0.06</b>  | 0.03         |
| Sport                                 | 0.02         | <b>-0.07</b> | -0.04       | -0.07        | <b>-0.08</b> | <b>-0.04</b> | <b>0.06</b>  | -0.12        | -0.08       | -0.12        | <b>-0.09</b> | <b>-0.07</b> |
| Cold water swimming                   | <b>0.03</b>  | 0.05         | 0.03        | 0.06         | <b>-0.04</b> | <b>-0.03</b> | <b>0.05</b>  | 0.02         | -0.06       | -0.12        | <b>-0.08</b> | <b>-0.05</b> |
| Vitamins and supplements              | <b>-0.03</b> | 0.02         | 0.01        | 0.02         | 0.02         | 0.00         | -0.03        | 0.00         | 0.01        | 0.01         | 0.00         | <b>0.05</b>  |
| Volunteering                          | -0.01        | 0.02         | 0.03        | -0.03        | -0.02        | 0.00         | <b>0.04</b>  | 0.07         | 0.04        | 0.07         | 0.00         | 0.00         |
| Walking in nature                     | -0.03        | <b>-0.12</b> | 0.00        | -0.07        | <b>-0.14</b> | <b>-0.08</b> | 0.01         | 0.15         | 0.09        | -0.05        | <b>-0.07</b> | <b>-0.09</b> |
| Frequent use of sauna                 | -0.01        | <b>-0.16</b> | -0.12       | 0.11         | <b>-0.05</b> | -0.02        | -0.02        | -0.07        | 0.05        | -0.04        | -0.04        | -0.01        |
| Dog                                   | 0.01         | <b>0.09</b>  | <b>0.08</b> | 0.07         | <b>0.02</b>  | 0.00         | 0.01         | 0.02         | -0.01       | 0.01         | <b>0.06</b>  | <b>0.04</b>  |
| Cat                                   | -0.01        | -0.01        | 0.05        | 0.05         | <b>0.03</b>  | <b>0.05</b>  | 0.03         | 0.06         | 0.03        | <b>0.13</b>  | <b>0.05</b>  | 0.02         |
| Bird                                  | -0.01        | 0.01         | 0.01        | -0.04        | <b>0.03</b>  | 0.01         | 0.02         | -0.04        | 0.01        | -0.09        | 0.02         | -0.01        |
| Reptile                               | 0.02         | <b>-0.08</b> | -0.05       | <b>-0.10</b> | 0.00         | -0.01        | 0.01         | -0.04        | -0.07       | -0.07        | 0.01         | 0.03         |
| Fish                                  | -0.02        | 0.00         | 0.06        | 0.01         | <b>0.02</b>  | 0.00         | 0.02         | -0.07        | 0.00        | -0.02        | 0.02         | 0.01         |
| Rabbit                                | -0.02        | 0.03         | 0.02        | 0.04         | 0.01         | <b>0.02</b>  | <b>0.06</b>  | 0.02         | -0.02       | 0.02         | 0.00         | 0.02         |
| Guinea pigs, hamster                  | 0.01         | 0.03         | 0.01        | 0.00         | <b>0.04</b>  | <b>0.05</b>  | 0.02         | <b>-0.10</b> | 0.01        | 0.05         | 0.03         | 0.02         |
| Fowls                                 | 0.01         | 0.01         | 0.00        | 0.03         | 0.01         | -0.01        | -0.02        | 0.04         | -0.05       | 0.00         | 0.02         | -0.01        |
| Goats, sheep                          | -0.02        | 0.02         | 0.04        | 0.02         | 0.01         | -0.01        | -0.01        | 0.05         | -0.05       | 0.00         | 0.01         | 0.01         |
| Mouse, rat                            | <b>0.04</b>  | -0.01        | 0.03        | 0.03         | <b>0.05</b>  | <b>0.03</b>  | -0.01        | <b>-0.14</b> | -0.09       | -0.04        | -0.01        | -0.03        |
| Pig                                   | -0.02        | -0.01        | -0.01       | 0.03         | 0.01         | -0.02        | <b>0.05</b>  | -0.05        | -0.07       | 0.01         | 0.01         | -0.01        |
| Horse                                 | 0.01         | 0.03         | 0.06        | 0.01         | 0.00         | -0.02        | 0.03         | -0.08        | -0.06       | -0.06        | <b>0.07</b>  | <b>0.04</b>  |
| Being overweight                      | 0.02         | <b>0.09</b>  | <b>0.11</b> | <b>0.13</b>  | <b>0.04</b>  | 0.00         | -0.01        | -0.05        | 0.07        | 0.01         | 0.03         | -0.02        |
| Being obese                           |              |              |             |              |              |              |              |              |             |              |              |              |
| BMI>30                                | 0.00         | 0.04         | -0.03       | <b>0.08</b>  | <b>0.12</b>  | <b>0.03</b>  | <b>0.04</b>  | 0.04         | 0.03        | <b>0.12</b>  | <b>0.08</b>  | -0.01        |
| Being underweight                     | -0.01        | 0.00         | -0.02       | -0.05        | 0.01         | <b>0.03</b>  | 0.01         | 0.04         | 0.02        | -0.07        | -0.02        | -0.01        |
| Diabetes                              | -0.02        | 0.05         | 0.02        | -0.03        | <b>0.09</b>  | 0.01         | 0.00         | <b>0.14</b>  | 0.07        | 0.02         | <b>0.07</b>  | 0.01         |
| Cardiovascular problems               | -0.02        | 0.03         | 0.03        | 0.06         | <b>0.08</b>  | <b>0.04</b>  | 0.00         | 0.11         | <b>0.14</b> | 0.03         | <b>0.16</b>  | <b>0.04</b>  |
| Asthma                                | -0.01        | <b>0.11</b>  | 0.00        | -0.03        | <b>0.14</b>  | <b>0.07</b>  | 0.03         | 0.12         | <b>0.18</b> | 0.11         | <b>0.18</b>  | 0.03         |
| Chronic obstructive pulmonary disease | -0.02        | <b>0.10</b>  | <b>0.10</b> | 0.06         | <b>0.05</b>  | <b>0.03</b>  | -0.03        | <b>0.15</b>  | 0.11        | 0.08         | <b>0.08</b>  | <b>0.05</b>  |
| Immunodeficiency                      | <b>-0.03</b> | <b>0.08</b>  | <b>0.10</b> | <b>0.16</b>  | <b>0.16</b>  | <b>0.10</b>  | 0.03         | <b>0.17</b>  | 0.13        | 0.12         | <b>0.11</b>  | <b>0.06</b>  |
| Allergy                               | 0.01         | 0.04         | 0.04        | <b>0.10</b>  | <b>0.15</b>  | 0.02         | 0.01         | 0.10         | 0.08        | -0.01        | <b>0.14</b>  | <b>0.05</b>  |
| Autoimmunity                          | 0.00         | 0.09         | 0.06        | 0.01         | <b>0.07</b>  | 0.01         | <b>0.09</b>  | 0.12         | 0.09        | 0.01         | <b>0.09</b>  | 0.02         |
| Toxoplasmosis                         | -0.01        | -0.06        | -0.14       | <b>-0.17</b> | 0.01         | 0.03         | 0.05         | 0.20         | 0.30        | 0.10         | 0.05         | 0.03         |
| Borreliosis                           | <b>-0.06</b> | 0.03         | 0.00        | -0.03        | 0.03         | <b>0.05</b>  | <b>-0.07</b> | -0.09        | -0.08       | -0.19        | -0.01        | 0.02         |
| Depression                            | 0.00         | <b>0.09</b>  | 0.02        | -0.01        | <b>0.14</b>  | <b>0.36</b>  | 0.01         | 0.01         | 0.06        | 0.11         | <b>0.14</b>  | <b>0.32</b>  |
| Anxiety                               | <b>0.05</b>  | <b>0.10</b>  | <b>0.09</b> | -0.05        | <b>0.18</b>  | <b>0.42</b>  | -0.01        | -0.01        | 0.04        | -0.03        | <b>0.16</b>  | <b>0.41</b>  |
| Vitamin A                             | 0.02         | <b>-0.18</b> | -0.03       | 0.11         | 0.00         | -0.01        | -0.06        | -0.02        | 0.06        | -0.24        | -0.01        | 0.04         |
| Vitamin B                             | 0.02         | -0.01        | 0.13        | 0.06         | <b>0.07</b>  | 0.00         | 0.00         | -0.18        | -0.12       | <b>-0.42</b> | -0.03        | 0.02         |
| Vitamin C                             | 0.04         | 0.12         | 0.16        | 0.15         | <b>0.08</b>  | 0.01         | -0.02        | -0.18        | -0.12       | -0.29        | -0.04        | -0.01        |
| Vitamin D                             | <b>-0.06</b> | -0.04        | 0.00        | -0.17        | 0.01         | -0.03        | -0.05        | -0.01        | 0.03        | -0.04        | 0.02         | 0.05         |
| Vitamin E                             | 0.00         | -0.07        | 0.08        | 0.00         | 0.01         | -0.02        | -0.05        | -0.02        | -0.09       | -0.24        | -0.02        | 0.06         |
| Vitamin K                             | -0.01        | -0.07        | 0.09        | -0.01        | 0.00         | -0.04        | 0.01         | 0.10         | 0.24        | 0.02         | <b>-0.09</b> | <b>-0.08</b> |
| Magnesium                             | -0.02        | 0.10         | 0.08        | -0.04        | 0.03         | 0.02         | 0.03         | 0.09         | -0.02       | 0.11         | -0.02        | 0.02         |
| Zinc                                  | -0.03        | -0.03        | -0.02       | -0.06        | 0.00         | 0.01         | -0.03        | 0.05         | 0.08        | -0.04        | -0.01        | 0.04         |
| Selenium fluoride                     | 0.02         | -0.10        | -0.02       | -0.12        | 0.03         | -0.01        | -0.06        | N/A          | -0.20       | N/A          | 0.00         | -0.04        |

|                     |              |              |       |       |              |              |             |       |             |              |              |              |  |
|---------------------|--------------|--------------|-------|-------|--------------|--------------|-------------|-------|-------------|--------------|--------------|--------------|--|
| iodine              |              |              |       |       |              |              |             |       |             |              |              |              |  |
| Calcium             | 0.00         | -0.11        | 0.08  | -0.12 | 0.03         | 0.00         | -0.06       | -0.01 | -0.02       | -0.19        | -0.03        | 0.03         |  |
| Iron                | -0.02        | <b>-0.18</b> | 0.03  | -0.18 | <b>0.05</b>  | -0.04        | -0.05       | 0.16  | -0.07       | 0.07         | -0.04        | -0.01        |  |
| Antioxidants        | 0.00         | 0.07         | -0.04 | 0.01  | -0.03        | 0.00         | 0.05        | 0.17  | 0.18        | 0.23         | -0.01        | 0.04         |  |
| Fatty acids         | -0.02        | 0.09         | -0.02 | -0.08 | 0.02         | 0.03         | <b>0.09</b> | -0.03 | 0.05        | <b>-0.46</b> | 0.00         | 0.04         |  |
| Coenzyme Q10        | 0.00         | -0.15        | -0.05 | -0.19 | 0.04         | 0.01         | -0.02       | 0.16  | -0.07       | 0.07         | 0.01         | <b>0.08</b>  |  |
| Apple cider vinegar | -0.01        | 0.16         | 0.16  | 0.02  | 0.00         | 0.04         | 0.04        | -0.13 | -0.04       | 0.03         | -0.06        | -0.06        |  |
| Coconut oil         | -0.02        | 0.09         | -0.02 | -0.01 | 0.00         | -0.03        | 0.03        | 0.14  | 0.29        | 0.34         | -0.04        | -0.02        |  |
| Echinacea           | -0.01        | <b>0.25</b>  | 0.05  | 0.04  | 0.01         | <b>0.05</b>  | 0.01        | 0.21  | -0.13       | 0.24         | -0.02        | -0.04        |  |
| Immunglucan         | 0.00         | 0.08         | -0.10 | -0.16 | <b>0.06</b>  | <b>0.07</b>  | -0.05       | N/A   | N/A         | N/A          | <b>-0.07</b> | -0.04        |  |
| Lecithin            | -0.04        | N/A          | N/A   | N/A   | 0.02         | -0.01        | -0.01       | 0.02  | 0.31        | 0.17         | <b>-0.09</b> | -0.03        |  |
| Dimethyl sulfone    | -0.01        | N/A          | N/A   | N/A   | 0.04         | <b>-0.04</b> | -0.03       | N/A   | N/A         | N/A          | -0.02        | -0.02        |  |
| Chlorine dioxide    | -0.02        | N/A          | N/A   | N/A   | <b>0.05</b>  | 0.01         | -0.02       | N/A   | N/A         | N/A          | -0.04        | -0.06        |  |
| Collagen            | -0.04        | -0.06        | -0.04 | -0.09 | 0.00         | 0.01         | 0.00        | 0.22  | -0.02       | 0.07         | -0.05        | -0.02        |  |
| Green tea, matcha   | 0.01         | 0.01         | 0.00  | -0.13 | -0.02        | <b>0.04</b>  | 0.02        | 0.32  | <b>0.53</b> | 0.31         | 0.04         | <b>0.11</b>  |  |
| Chlorella           | 0.03         | 0.16         | 0.09  | -0.05 | -0.03        | 0.03         | 0.00        | 0.16  | -0.07       | 0.07         | 0.01         | -0.01        |  |
| Ginseng             | -0.01        | 0.02         | -0.08 | -0.01 | 0.04         | 0.01         | -0.02       | -0.01 | -0.07       | -0.30        | <b>0.07</b>  | 0.05         |  |
| Rooibos             | <b>-0.06</b> | 0.12         | -0.03 | -0.02 | -0.03        | 0.01         | -0.07       | 0.25  | 0.13        | 0.08         | <b>-0.09</b> | <b>-0.08</b> |  |
| Suppl. for pregnant | -0.04        | -0.09        | -0.10 | 0.17  | -0.01        | -0.05        | N/A         | N/A   | N/A         | N/A          | N/A          | N/A          |  |
| Sports suppl.       | -0.02        | <b>0.18</b>  | 0.11  | -0.14 | 0.02         | -0.02        | 0.01        | 0.29  | -0.02       | -0.03        | -0.05        | 0.00         |  |
| Weight loss suppl.  | 0.01         | 0.15         | 0.16  | 0.09  | -0.01        | 0.00         | -0.02       | N/A   | N/A         | N/A          | 0.00         | 0.00         |  |
| Yucca               | -0.02        | N/A          | N/A   | N/A   | 0.02         | <b>0.05</b>  | N/A         | N/A   | N/A         | N/A          | N/A          | N/A          |  |
| Vilcacora           | -0.02        | N/A          | N/A   | N/A   | -0.03        | 0.01         | -0.01       | N/A   | N/A         | N/A          | -0.03        | -0.04        |  |
| Lapacho             | <b>0.06</b>  | 0.13         | 0.13  | -0.05 | -0.02        | -0.02        | -0.01       | N/A   | N/A         | N/A          | <b>-0.07</b> | -0.04        |  |
| Chinese herbs       | 0.02         | 0.11         | 0.00  | 0.15  | <b>0.04</b>  | 0.02         | -0.04       | N/A   | N/A         | N/A          | 0.03         | <b>0.07</b>  |  |
| Medical herbs       | 0.02         | 0.09         | 0.04  | 0.04  | 0.04         | 0.01         | 0.06        | 0.08  | 0.19        | 0.21         | -0.02        | 0.03         |  |
| Vironal             | 0.03         | <b>0.20</b>  | -0.07 | 0.08  | 0.04         | -0.02        | -0.03       | N/A   | N/A         | N/A          | 0.01         | <b>-0.08</b> |  |
| Melatonin           | 0.02         | 0.08         | -0.07 | -0.04 | <b>0.07</b>  | <b>0.10</b>  | <b>0.10</b> | 0.21  | 0.22        | 0.16         | 0.03         | 0.03         |  |
| Cannabis            | 0.00         | <b>0.28</b>  | 0.09  | 0.01  | 0.02         | <b>0.04</b>  | -0.01       | -0.07 | 0.02        | -0.23        | -0.05        | 0.01         |  |
| Aloe vera           | 0.00         | <b>0.23</b>  | 0.01  | 0.11  | 0.02         | 0.01         | -0.07       | N/A   | N/A         | N/A          | -0.05        | -0.03        |  |
| Homeopathics        | 0.04         | 0.13         | 0.04  | 0.00  | 0.03         | <b>0.07</b>  | 0.04        | 0.02  | 0.31        | 0.17         | 0.06         | 0.06         |  |
| Adaptogenic fungi   | -0.04        | N/A          | N/A   | N/A   | 0.04         | 0.02         | -0.03       | N/A   | N/A         | N/A          | -0.02        | -0.02        |  |
| Enzymes             | -0.02        | N/A          | N/A   | N/A   | -0.01        | 0.01         | <b>0.12</b> | 0.16  | -0.07       | 0.07         | 0.03         | 0.03         |  |
| Flavonoids          | 0.00         | 0.15         | -0.05 | 0.07  | 0.00         | 0.01         | -0.03       | N/A   | N/A         | N/A          | 0.02         | 0.05         |  |
| Sea buckthorn       | 0.01         | <b>0.31</b>  | 0.10  | 0.04  | 0.01         | -0.02        | -0.04       | -0.20 | -0.07       | -0.26        | <b>-0.09</b> | -0.04        |  |
| Supplements other   | 0.01         | 0.09         | -0.06 | -0.14 | <b>-0.08</b> | -0.04        | -0.01       | -0.33 | -0.31       | -0.11        | 0.03         | 0.02         |  |

131

132 *Results of partial Kendall analyses performed separately for women and men. For further*

133 *information, see the legend of Table 3.*

134

## 135 Discussion

136 In this prospective cohort study, we analysed the effects of 105 potential protective and risk factors

137 related to the incidence and severity of Covid-19 disease. We compared the incidence of Covid-19

138 and its severity (based on three different criteria), and both physical and mental health at the

139 moment of filling the second questionnaire in subjects who had and had not been exposed to 105

140 focal factors before the start of the fourth wave of the Covid-19 epidemic in the Czech Republic. All

141 participants were members of the Covid-negative cohort of internet users who shared with us  
142 information about their exposure to risk factors and protective factors in an electronic questionnaire  
143 distributed before the beginning of the fourth wave of the epidemic, on average 125 days before  
144 completing the second questionnaire. We grouped the factors into five categories: (1) biological  
145 factors including morphological traits, (2) sociodemographic factors, (3) behavioural traits/lifestyle  
146 variables, (4) contacts with animals, (5) comorbidities, and (6) use of vitamins and supplements.

147 In the first category, that of biological factors, we detected effects of sex and age on the risk of SARS-  
148 CoV-2 infection. Women and older subjects had a lower risk of infection; the possible role of  
149 behavioural immunity is discussed below. On the other hand, they also reported a more severe  
150 course of Covid-19. Only the latter corresponded to previously published findings<sup>1</sup>. In general,  
151 women reported worse physical and mental health at the end of the study than men did. In  
152 accordance with the clinical experience and several published studies<sup>2,5,6,11</sup>, individuals with higher  
153 weight and higher BMI experienced a more severe course of the disease. Surprisingly, taller and  
154 heavier men also ran a higher risk of infection than lighter and shorter men. Height was primarily  
155 responsible for this association because the association between infection and height was stronger  
156 than the association of infection with weight or BMI (the latter showed no association). In women,  
157 we found no association between height and increased risk of infection.

158 We should bear in mind, though, that questions about body weight and height were included only in  
159 the second questionnaire and the findings may have been influenced by the disease rather than  
160 being a risk factor of it. This is naturally not an issue for body height, which could not well change  
161 due to Covid-19, but it could have negatively influenced the effect size of association between body  
162 weight and the risk of SARS-CoV-2 infection and, although less so, it may have had an effect on the  
163 severity of course of Covid-19. It is likely that Covid-19, especially in case of a severe disease, has a  
164 negative effect on a person's weight, which means that the association between body weight or BMI  
165 and infection rate and severity of Covid-19 is probably stronger than suggested by the strength of  
166 correlations detected in our study.

167 The lower risk of the infection in men and older subjects was probably due to increased effort of  
168 people who considered themselves especially at risk to avoid possible sources of infection: we  
169 observed the same phenomenon (in the form of significant effects or trends) in subjects with other  
170 known risk factors, such as immunodeficiency or chronic obstructive pulmonary disease. Notable  
171 exceptions (higher probability of infection in risk populations) were autoimmunity and obesity (BMI >  
172 30) in men, which had relatively strong positive effects on the risk of infection. One could speculate  
173 whether these (and possibly also other) factors actually had a positive effect on the risk of infection

174 or whether simply by their effect on the course of infection they increased the likelihood of a  
175 symptomatic course of Covid-19 and therefore also of the probability of the infection being  
176 recognised and officially diagnosed.

177 It has been generally expected that vitamin D ought to protect against Covid-19<sup>12</sup> and it is known  
178 that redhaired individuals can synthesise more vitamin D in conditions of lower intensity of UV  
179 radiation, that is, in the higher latitudes of temperate zones<sup>13</sup>. We have therefore expected that the  
180 intensity of red colour of hair would negatively correlate with the risk of infection or severity of  
181 Covid-19. A negative association between taking vitamin D supplements and risk of SARS-CoV-2  
182 infection was confirmed by our data (see below) but we found no significant association between the  
183 intensity of red colour of hair and the risk of infection or a severe course of Covid-19. We only  
184 confirmed an earlier reported observation that redhaired subjects have a higher index of physical  
185 disease<sup>14</sup>. It is possible that the favourable effect of having red hair and associated effect on the  
186 synthesis of vitamin D and the adverse effect of redhaired phenotype on physical health cancel each  
187 other out.

188 Our data showed that dark-haired women but not men had a lower risk of SARS-CoV-2 infection and  
189 a less severe course of Covid-19. This higher resistance of dark-haired subjects is probably the result  
190 of generally better health of dark-haired individuals in the Czech population<sup>13,15</sup>. It is thus telling that  
191 dark-haired subjects – and even more so subjects with darker skin tone – had also a less severe  
192 course of Covid-19 (though it was significant only in women) and reported better physical health in  
193 the second questionnaire. It should be noted that for historical reasons, Czech population is  
194 ethnically highly homogenous and consists nearly exclusively of white Caucasian persons. The  
195 questionnaire was in Czech, a difficult Slavic language understood only by Czech and Slovaks. It is  
196 thus very likely that only ethnic Europeans took part in the study.

197 Blood group (system ABO) had a moderate effect on the risk of Covid-19 infection and probably no  
198 effect on its course. Individuals with blood group O had a lower and those with blood group B a  
199 higher risk of infection. The former concurs with the majority of published findings<sup>16,17</sup>. The higher  
200 risk of the infection in subjects with blood group B also agrees with published data, but a meta-  
201 analytic study showed that blood group A usually has a stronger effect on the risk of Covid-19 than  
202 blood group B does<sup>18</sup>. Both effects were stronger and statistically significant in men, while in women  
203 they were weaker and nonsignificant. Men with blood group B reported worse physical health in the  
204 second questionnaire, while those with blood group O reported better physical but worse mental  
205 health.

206 Rh factor had no significant effect on the risk of infection. Rh-positivity had only nonsignificant  
207 effects on the severity of course of Covid-19 (significant for the severity of symptoms index in men)  
208 which concurs with previously published data <sup>18</sup>. Similarly, Rh-heterozygosity had no significant effect  
209 on the risk or severity of Covid-19, but that could be at least in part due to the relatively low number  
210 of participants whose heterozygosity could be determined based on their Rh-phenotype and the Rh-  
211 phenotype of their parents. Our results indicate that potential effects of Rh factor on the risk and  
212 severity of Covid-19 do deserve further attention, but investigation of this phenomenon should be  
213 preferably based on DNA-genotyped populations because Rh-positive heterozygotes have better and  
214 Rh-positive homozygotes worse health than Rh-negative individuals <sup>19</sup>.

215 Sociodemographic factors had a moderate effect on the risks of Covid-19. People who live in larger  
216 cities and individuals with higher education, especially women, had a lower risk of infection, which is  
217 in agreement with published data <sup>20</sup>. Household size, and in men especially the number of children  
218 under 20 years of age, was associated with a higher risk of infection, which again agrees with  
219 published data <sup>3,4</sup>. People living on their own had a much lower risk of infection than those who share  
220 household with someone else and singles also reported a less severe course of Covid-19. Both of  
221 these effects were highly significant. Education level and in women also household size had the  
222 strongest protective effects against a severe or long course of Covid-19. Family income before the  
223 beginning of the pandemic had no significant effect on the risk of infection or the course of Covid-19  
224 disease. This contrasts with findings of another prospective study which found a twice higher risk of  
225 Covid-19 in low-income individuals <sup>20</sup>. That study, however, took into account only hospitalised  
226 patients. Income was positively correlated with physical and mental health at the moment of filling in  
227 the second questionnaire. It should be born in mind, though, that in the Czech Republic, nearly all  
228 medical care except for non-essential dentistry procedures and medical drugs that have cheaper  
229 alternatives is paid for from mandatory medical insurance. On the other hand, it is likely that higher-  
230 income individuals invest more in disease prevention.

231 Many behavioural traits had protective effects against the infection while three factors, namely being  
232 actively involved in sport (in both men and women), frequent singing (only in men), and cold water  
233 swimming (in both men and women), increased the risk of infection. We can only speculate about  
234 the proximal reasons of these findings. It seems likely that these activities increase the risk of  
235 infection only indirectly, that is, by increasing the number of physical contacts with other people. It  
236 is, however, also possible that singing facilitates the transmission of the virus even directly. A large  
237 community-based cohort study performed on 387,109 UK citizens showed a positive effect of  
238 physical inactivity on the risk of Covid-19 but the study took into account only hospitalised patients  
239 and not the much numerous subjects without a severe course of Covid-19 <sup>21</sup>. The negative effect of



240 sport on the risk of hospitalisation thus probably reflects the negative effect of physical activity on  
241 the risk of severe Covid-19 (observed also in our study), rather than its negative effect on the risk of  
242 the SARS-CoV-2 infection.

243 The strongest protective factor against Covid-19 infection was strict adherence to wearing masks and  
244 respirators; this factor was stronger in men than in women. Based on the results of laboratory tests,  
245 it is usually supposed that the wearing of masks, and even more so respirators, protects individuals  
246 against infection with SARS-CoV-2 (and not only against transmitting the infection to other people).  
247 On the other hand, the results of a metanalytic study show that empirical evidence for this claim is  
248 relatively weak<sup>22</sup>. To the best of our knowledge, there is no published prospective longitudinal study  
249 that examined the effects of wearing masks on the risk of Covid-19 or its severity.

250 The second strongest protective factor was the consumption of vitamins and supplements. Analyses  
251 performed separately for women and men had shown that the strongest protective factor in women  
252 was walking in nature, possibly an indication of a solitary activity of more introverted women,  
253 because in men, walking in nature was a risk factor, albeit a weak and nonsignificant one, rather than  
254 a protective factor. The strongest protective factor for men was adherence to wearing masks and  
255 respirators. Sustaining social distance and frequent washing hands had only a weak and non-  
256 significant effect in both men (p-values > 0.069) and women (p-values > 0.699).

257 We found that tobacco smoking (in both men and women) and partly also of marihuana use (in  
258 women) have a relatively strong protective effect against SARS-CoV-2 infection. Marihuana use, and  
259 less probably also tobacco smoking, could have also some protective effect against a severe course of  
260 Covid-19. Protective effects of tobacco smoking have been reported<sup>7</sup> and discussed<sup>23</sup> in some  
261 previous studies but most studies show adverse effects of smoking on the risk of a severe course of  
262 Covid-19<sup>2,11,21,24,25</sup>. Former smoking habit seems to have a three times stronger adverse effect than  
263 current smoking<sup>26</sup>, which agrees with the results of a metanalytic study based on 233 studies<sup>7</sup>. We  
264 have no explanation for the contradiction between our data and reported data except for a  
265 hypothetical publication bias: it is possible that authors and editors may be reluctant to publish  
266 results showing any positive effects of smoking. It should be mentioned, though, that in our study,  
267 smokers reported worse mental health and female smokers reported worse mental and physical  
268 health in the second questionnaire than non-smokers did.

269 The most unexpected result of this part of the study was the positive correlation between higher  
270 severity of the course of Covid-19 and adherence to wearing masks and respirators and to a lesser  
271 extent also with keeping social distance. We speculate that individuals with predisposition to a  
272 severe course of Covid-19, that is, mainly those who were overweight, suffered immunodeficiency,

273 chronic obstructive pulmonary disease, or diabetes, put more effort into trying to avoid infection and  
274 more strictly adhered to recommendations concerning wearing masks and maintaining safe distance.  
275 At the same time, if they did become infected they had a more severe course of the disease than  
276 individuals without such risk factors. The strength of these associations was lower or non-existent  
277 when the intensity of symptoms or duration of Covid-19 were used as a measure of severity of Covid-  
278 19 (except for the rather strong association between maintaining safe distance and duration of  
279 Covid-19 in women) and it was much stronger when we used a self-rated severity of the course of  
280 Covid-19. It is also possible that subjects who did not adhere to recommendations concerning  
281 personal protection against Covid-19 were later more reluctant to admit that they had a serious  
282 course of the disease. Alternatively, one could also speculate that more anxious people followed  
283 existing recommendations concerning individual protection against Covid-19 more strictly but they  
284 also tended to have a more severe course of Covid-19 if they did become infected. On the other  
285 hand, the strength of all the associations remained approximately the same when we included in the  
286 model reported intensity of anxiety and depression (partial Tau: masks 0.105 vs 0.109; distance 0.107  
287 vs 0.107).

288 Coldwater swimming had a positive effect on physical and mental health at the time of filling the  
289 second questionnaire but it also seemed to be associated with a nonsignificantly more severe course  
290 of Covid-19 in women. Better immunity of people who are involved in this activity, which is popular  
291 in the Czech Republic, could have a negative effect on the course of Covid-19, possibly by increasing  
292 the risk of interleukin storm. A more probable explanation, however, is that subjects involved in this  
293 activity rarely suffer from seasonal colds, the flu, and another infectious diseases (either due to the  
294 effect of this activity or because only resistant people could perform such activity) and therefore  
295 rated the course of their Covid-19 infection as more serious than other individuals would.

296 In contrast, frequent use of sauna not only had a positive effect on physical and mental health (i.e.,  
297 negative effect on the illness indices) at the time of filling the second questionnaire but was also  
298 negatively associated with a severe course of Covid-19. Taking all participants together, active sport  
299 and frequent use of a sauna had a strong protective effect against a severe course of Covid-19, the  
300 effect of sport being stronger in men, the effect of using a sauna in the woman.

301 Keeping certain animals could be a risk factor for acquiring the SARS-CoV-2 infection and it could also  
302 affect the risk of a severe course of Covid-19. Having cats or dogs as pets had no effect on the risk of  
303 infection and mostly nonsignificant positive effects on the risk of a severe course of Covid-19. The  
304 significant positive associations between dog keeping and more severe symptoms of Covid-19 in  
305 women (Tau = 0.095,  $p = 0.003$ ) and between cat keeping and duration of Covid-19 in men (Tau =

306 0.134,  $p = 0.003$ ) deserve future attention, but both could be just artifacts of multiple tests (see  
307 below). Similarly, the relatively weak effects of keeping other animals (rodents and pigs) on the risk  
308 of a more severe course of Covid-19 were probably just artifacts of multiple tests. It must be,  
309 however, reminded that hamsters are susceptible to the SARS-CoV-2 infection<sup>27</sup>.

310 Known health-related predispositions to a worse course and outcome of Covid-19 mostly yielded the  
311 anticipated effects. The most severe impact was observed for immunodeficiency, autoimmunity, and  
312 chronic obstructive pulmonary disease but relatively strong were also the effects of being  
313 overweight, cardiovascular problems, and diabetes. Surprisingly, we did not detect any effect of  
314 latent toxoplasmosis, which was reported to be the strongest risk factor for the SARS-CoV-2 infection  
315 and for a severe course of Covid-19 in a previous cross-sectional study<sup>9</sup>. It is rather unlikely that this  
316 discrepancy between results is due to differences in the experimental design (prospective cohort  
317 study vs. cross-sectional study). More likely is that the difference in risk factors could be caused by  
318 differences between the biological properties of the standard variant of SARS-CoV-2, which was the  
319 agent of all Covid-19 disease during the second and third wave of Covid-19, and alpha mutant of  
320 SARS-CoV-2, which was the agent of most Covid-19 cases during the fourth wave in the Czech  
321 Republic, which was the subject of the present study. It is known that not only infectivity but also the  
322 clinical picture of infection differs between the earlier and the beta variants of SARS-CoV-2<sup>28</sup>.

323 Another surprising finding was a very strong protective effect which having undergone borreliosis  
324 had against the infection in both sexes and, though only in men, also against a severe course of the  
325 disease. This effect has not been observed in the previous cross-sectional study<sup>9</sup>. One could  
326 speculate that the extracellular parasite *Borrelia* redirects immunoreactivity of the host from  
327 humoral to cellular immunity, which might provide some protection against SARS-CoV-2. Moreover,  
328 the immunoregulative activity of *Borrelia* could provide some protection against a cytokine storm.  
329 And last but not least, borreliosis affects the physical and mental health, and secondarily also the  
330 behaviour of chronically infected subjects, which could likewise affect the risk of acquiring the SARS-  
331 CoV-2 infection [29]. As mentioned above, the protective effects against Covid-19 infection were  
332 relatively strong and significant in both women (Tau = -0.065,  $p = 0.0006$ ) and men (Tau = -0.075,  $p =$   
333 0.009), but they could be the result of an artifact of multiple tests. In many countries, including the  
334 Czech Republic, seroprevalence of borreliosis is rather high<sup>29</sup>. In the present study, it was 36% in  
335 Covid-negative and 26% in Covid positive participants. The observed protective effects, which seem  
336 to be stronger in men than in women, therefore deserve utmost attention in future studies.

337 All factors known to increase the risk of a severe course of Covid-19, with the exception of being  
338 overweight, provided some protection against acquiring the infection in women, but the effects were

339 in nearly all cases nonsignificant. We suspect that people belonging to at-risk groups try more  
340 intensively (and at least partly successfully) to avoid contracting the infection. On the other hand, we  
341 did not observe any protective effect of depression or anxiety against acquiring the infection: in fact,  
342 more anxious women had a higher risk of acquiring Covid-19 and both depression and anxiety  
343 positively correlated with a higher probability of a more severe course of Covid-19 in women. This  
344 suggests that neither depression nor anxiety act as efficient instruments of human behavioural  
345 immunity against Covid-19.

346 During the epidemic, it has been suggested that regular taking of certain vitamins might act as  
347 prevention against Covid-19. People who live in the Czech Republic have often insufficient intake or  
348 photosynthesis of vitamin D and regular use of vitamin D supplements was therefore recommended  
349 by physicians as useful prevention against Covid-19. In our study, vitamin D provided significant  
350 protection against acquiring SARS-CoV-2 infection. Rather unexpectedly, though, the strongest  
351 protective effect against the infection was found for drinking rooibos, which is at least in the Czech  
352 Republic not considered a medical herb and it has not been suggested that it could help in Covid-19  
353 prevention. It is known that rooibos, which is a fermented extract from the leaves of *Aspalathus*  
354 *linearis*, has both antioxidant and anti-inflammatory activities. Both in vitro and in vivo studies show  
355 that two major active dihydrochalcones found in the rooibos suppress vascular inflammation induced  
356 by high glucose or lipopolysaccharide in human vein endothelial cells. In mice, they suppress vascular  
357 inflammation caused by a wide range of molecular mechanisms including the inhibition of  
358 inflammatory cytokines and oxidative stress<sup>30-34</sup>. It has been suggested by the authors of the  
359 corresponding study (performed on laboratory rodents) that aquatic extracts from the rooibos, i.e.,  
360 rooibos tea, could be used to modulate oxidative stress and suppress inflammatory response<sup>35</sup>.  
361 Moreover, thanks to the absence of caffeine in rooibos, it could be useful for reducing oxidative  
362 stress especially in children<sup>36</sup>. As far as we know, no data on the effects of rooibos or its biologically  
363 active components have been published yet: an inquiry for rooibos AND Covid resulted in zero hits at  
364 WOS, Pubmed, MedRxiv, and BioRxiv.

365 This study had a character of exploratory research. All factors we planned to analyse were  
366 preregistered before the start of data collection to avoid the danger of cherry-picking artifacts.  
367 Nevertheless, the number of factors we examined (105) was so large that artifacts of multiple tests  
368 could be easily responsible for many significant results. It is mostly considered unnecessary or even  
369 counterproductive to perform a correction for multiple tests in exploratory studies<sup>37</sup> but in the  
370 present study, we decided (and preregistered) to perform this correction. To this purpose, we used  
371 the Benjamini-Hochberg method with a false discovery rate preset to 0.2, which is also why only 80%  
372 (140) of the 175 results indicated in bold in Table 3 as significant are expected to be significant in

373 reality. In this context, it should be noted that the value of p before or after the abovementioned  
374 correction cannot itself discriminate between truly significant and false significant associations. For a  
375 discussion of the theoretical background of the method, relation between FDR and p-value, and  
376 superiority of controlling FDR over other methods of elimination of multiple tests artifacts, kindly  
377 refer to <sup>38,39</sup> .

378 We would also like to draw attention here to the existence of a phenomenon of p-value spillover,  
379 that is, the effect of presence of many significant effects in a subset of factors (e.g. a subset of  
380 behavioural variables) on another subset of factors in which only a few or no effects exist (e.g. the  
381 subset of variables related to keeping animals). After the Benjamini-Hochberg or sequential  
382 Bonferroni correction, some significant effects in the former group will turn out to be nonsignificant  
383 and some nonsignificant effects in the latter group will become apparently significant.

384 The difficulty of recognising what is the cause and what the effect, what is a direct and what an  
385 indirect effect of a factor, and especially which factors affect the output variable and which merely  
386 indicate the existence of another (possibly an unknown) factor affecting the output variable are all  
387 serious problems affecting observational epidemiological studies. Unlike cross-sectional studies,  
388 longitudinal studies could discriminate between some alternatives but even these studies are not  
389 omnipotent. For example, by applying the Bradford Hill temporality criterium <sup>40</sup>, we can be sure that  
390 the negative association between wearing masks (or taking vitamins) and acquiring the SARS-CoV-2  
391 infection is not caused by a higher willingness of those who already had Covid-19 to protect  
392 themselves against the infection (or to treat symptoms or aftereffects of Covid-19). But we cannot  
393 exclude the possibility that some subpopulation of people protects itself against the infection in  
394 many ways, including wearing face masks, and that some of these methods of protection (but not the  
395 wearing of face masks) have a strong protective effect against Covid-19. Similarly, the observed  
396 strong positive association between taking echinacea and a severe course of Covid-19 could be  
397 caused by certain health problems which the subjects try to treat by echinacea and which also later  
398 predispose the subjects to a worse course of Covid-19, that is, it is possible that the effect is due to a  
399 kind of protopathic bias <sup>41</sup>. The issue of causality could only be definitively solved by an intervention  
400 study, that is, by randomly assigning participants of a double-blind experiment into two groups and  
401 supplying one group with drug and the other with a placebo. Naturally, such experiments cannot be  
402 performed so as to investigate factors which are expected to have adverse effects on the course of a  
403 disease in humans. Also, it is sometimes technically difficult to perform a double-blind or blind  
404 experiment with some protective factors, such as wearing face masks.

405 Strengths and limitations of the study

406 The most important advantage of the present study is its prospective longitudinal nature, its  
407 preregistration, and the large number of participants involved.

408 The most serious limitation of the study is the fact that participants were self-selected and do not  
409 represent a typical sample of a general population. The use of nonrepresentative samples (i.e.,  
410 samples with less variability than is found in general population) increases the likelihood of finding  
411 even weak significant effects if they in fact exist. On the other hand, this setup could also artificially  
412 increase or decrease the observed strength of detected effects (the amount of variability in an  
413 output variable explained by the factors under study)<sup>42</sup>. In short, due to the specific composition of  
414 the population of study participants, we must be careful with generalisation of the findings.

415 The second problem is that ‘survivorship bias’ could affect the results of some tests: Subjects who  
416 experienced a very severe course of Covid-19 were probably less likely to participate in the second  
417 part of the study (less likely to fill the second questionnaire) and those who died due to Covid-19  
418 could not participate at all. In the Czech Republic, case mortality rate during the third and fourth  
419 waves of Covid-19 was about 1.9 % but the mean age of participants of our study was 43 and  
420 mortality in that age group was much lower. A low number of participants who died during the study,  
421 if any, could thus hardly affect the results of analyses aimed at identifying the risk and protective  
422 factors against the infection. On the other hand, a higher dropout rate of those participants who  
423 suffered a more severe course of the infection could affect the results of tests aimed at risk and  
424 protective factors against a severe course of Covid-19. It is, for example, possible that a large part of  
425 subjects with a certain risk factor, for instance those with chronic obstructive pulmonary disease or  
426 those with toxoplasmosis, had such a severe course of Covid-19 that they mostly did not participate  
427 in the second part of the study. Along similar lines, a seemingly milder course of Covid-19 in subjects  
428 who did not strictly adhere to mask wearing could be due to a survivorship artifact. There is probably  
429 no way of eliminating this kind of bias in questionnaire studies.

430 The third limitation of the study is the relatively low number of subjects affected by some factors. All  
431 in all, this study is based on a large number of subjects but the number of those who met a particular  
432 risk or protective factor could be rather low. For example, the number of subjects who drank rooibos  
433 and were not infected with SARS-CoV-2 was 121 (10.8%), while just 3 participants (3.3 %) drank  
434 rooibos and were infected with SARS-CoV-2. The equivalent numbers for, e.g., using marihuana,  
435 keeping rabbits, or being infected with *Toxoplasma* were 54/4, 783/132, and 153/25, respectively  
436 (see Table 1). Technically, a low or imbalanced number of subjects in particular groups is not a  
437 problem. Partial Kendall test is in principle an exact test and can thus be used to analyse this type of  
438 data, but small sample sizes and imbalanced distribution of observations in particular categories

439 increases the risk of Type-1 error, i.e., increases the risk of not finding an existing effect. Of course,  
440 neither a small sample size nor imbalanced distribution could result in Type-2 errors, i.e., in detecting  
441 non-existent effects (see the Monte-Carlo model in the Appendix of <sup>43</sup>).

442

#### 443 **Conclusions**

444 The present preregistered longitudinal study performed on a large population of internet users  
445 confirmed that some recommended measures, such as wearing masks or taking vitamin D, indeed  
446 protected participants against SARS-CoV-2 infection or a severe course of Covid-19, while other  
447 factors, even those that have a generally positive effect on health, such as sport or swimming in cold  
448 water, increased the risk of SARS-CoV-2 infection. The explorative nature of the study also brought  
449 some unexpected findings: for instance, we found a strong protective effect of being diagnosed with  
450 borreliosis in the past or drinking rooibos. Although the observed effects were strong and remained  
451 highly significant even after correction for multiple tests, it will be necessary to confirm their  
452 existence in future independent studies.

#### 453 **Material and Methods**

454 Participants were recruited by a Facebook-based snowball method <sup>44</sup>. Calls for participation in the  
455 first part of the study were published about 15 times on the Facebook page of Labbunnies – a  
456 23,000-member group of Czech and Slovak nationals willing to participate in studies on evolutionary  
457 psychology and evolutionary parasitology and to help with recruiting further participants of such  
458 studies – and on the authors’ personal Facebook and Twitter accounts. The Qualtrics questionnaire  
459 used to gather data contained Facebook ‘share’ and ‘like’ buttons, so that participants could help  
460 recruit other participants by pressing these buttons. The buttons were pressed 12,000 times  
461 between 17 October 2020 and 3 March 2021. In total, we obtained data from 52,000 respondents. In  
462 the end, though, many subjects finished the questionnaire up to four times at different time points  
463 (which they indicated in the questionnaire); only the first record of a participant was included in this  
464 study. The final set contained data from about 30,000 respondents. The invitation as well as the  
465 informed consent form on the first page of the questionnaire contained only the most general  
466 information about the aims of the study and contents of the questionnaire. The participants were  
467 informed that the study would examine which factors affect the risk of catching the new coronavirus  
468 and severity of the course of Covid-19 disease and investigate people’s views regarding anti-epidemic  
469 measures. Participants were also informed that their participation is voluntary, that they can skip any  
470 questions they might find uncomfortable, and that they can terminate their participation at any point  
471 simply by closing the web page. Only subjects who consented to participate in the study by pressing

472 the corresponding button were allowed to take the questionnaire. Respondents were not paid for  
473 their participation but after finishing the 20-minute questionnaire, they received information about  
474 the results of related studies. The study was anonymous but participants had the option of providing  
475 their e-mail addresses for the purpose of a future longitudinal study (about 42% did) or could ask for  
476 their data to be deleted after completing the questionnaire (about 2% did). Data collection was  
477 performed in accordance with all relevant guidelines and regulations and the project, including the  
478 method of obtaining informed consent with participation in this anonymous study from all  
479 participants, was approved by the Institutional Review Board of the Faculty of Science, Charles  
480 University (Komise pro práci s lidmi a lidským materiálem Přírodovědecké Fakulty Univerzity Karlovy)  
481 — No. 2020/25). This first part of the study, including the questionnaire, was preregistered at the  
482 Open Science Framework: <https://doi.org/10.17605/OSF.IO/VWXJE>.

483 At the end of the fourth wave of Covid-19 in the Czech Republic, on 15 March 2021, we sent an email  
484 with an individualised link to the second electronic questionnaire to 12,600 subjects who provided  
485 their email address for this purpose at the end of the first questionnaire. About one-third of these  
486 emails have not been opened by the addressee, probably because they ended in their Junk or Spam  
487 folders. After two runs of reminders, the second questionnaire was filled by 8,084 subjects. This part  
488 of the project, a longitudinal prospective study, was preregistered at Open Science Framework  
489 (DOI 10.17605/OSF.IO/M7UVD).

#### 490 **Questionnaires**

491 Both surveys were run on the Qualtrics platform. The first questionnaire, which ran between 17  
492 October 2020 and 3 March 2021, consisted of three parts related to three different projects (Risk and  
493 protective factors, Opinions of the Czech public regarding anti-epidemic measures, and the effect of  
494 priming by studying graphs of Covid victims on opinions regarding anti-epidemic measures).

495 In the present study, only responses to questions related to Covid-19 risks and protective factors  
496 were inspected and analysed. Respondents were asked about their sex, age, household size (this  
497 variable was also used for the calculating the binary variable single/non-single), family income before  
498 the beginning of the epidemic, and size of their place of residence (scale 1–5, 0: under 1,000  
499 inhabitants, 1: 1–5,000 inhabitants, 2: 5–50,000 inhabitants, 3: 50–100,000 inhabitants, 4: 100–  
500 500,000 inhabitants, 5: over 500,000 inhabitants). Respondents indicated whether they had already  
501 contracted Covid-19 by choosing from five answers (1: ‘No’, 2: ‘Yes, I was diagnosed with it’, 3: ‘Yes,  
502 but I was not diagnosed with it’, 4: ‘I am awaiting the test results’, 5: ‘No, but I was in quarantine’).  
503 For purposes of the current study, answers 1 and 5 were coded as 0 (Covid-negative), answer 2 as 1  
504 (Covid-positive), and answers 3 and 4 were coded as NA (data not available).



505 In the main part of the questionnaire, respondents were asked to check which potential risks and  
506 protective factors apply to them, including keeping animals, taking vitamins and supplements, and  
507 being diagnosed with certain disorders often viewed as predisposing to a more severe course of  
508 Covid-19; for a list of corresponding binary variables, see column 1 of Table 1. In another part of the  
509 questionnaire, respondents were asked how strictly they follow measures related to personal  
510 protection against the infection, such as wearing masks, washing hands, and maintaining physical  
511 distance from other people. They had to answer the following three questions: ‘Do you abide by the  
512 measures concerning mask wearing/washing and disinfecting hands/maintaining safe distance (not  
513 to approach, not to touch)’ by choosing from five answers, namely 1: ‘No (on principle)’, 2: ‘No (due  
514 to indolence)’, 3: ‘Yes, but not too strictly’, 4: ‘Yes, I really strive’, 5: ‘Yes, strictly, and I try to convince  
515 people in my vicinity to do the same.’ Respondents were also asked whether they had ever been  
516 tested in a laboratory for toxoplasmosis and/or borreliosis and if so, what the result of this test was  
517 (negative/positive-infected/ ‘I do not know, I am not sure’). Similarly, respondents were asked about  
518 their blood ABO group (possible answers: A/B/AB/O/ ‘I do not know, I am not sure’) and Rh status  
519 (positive/negative/ ‘I do not know, I am not sure’). For identifying the subpopulation of Rh-positive  
520 heterozygotes, we also asked them about their parents’ Rh phenotype<sup>19</sup>. For questions regarding  
521 toxoplasmosis, borreliosis, and blood group, the questionnaire was pre-set to indicate the third  
522 response ‘I do not know, I am not sure’ as a default.

523

524 The second questionnaire

525 The second questionnaire, which was disseminated in March 2021, contained again a question about  
526 whether participants had already contracted Covid-19. Those who had been diagnosed with it were  
527 also asked to rate the severity of the course of the disease on a five-point scale (1: ‘No symptoms’, 2:  
528 ‘Like a mild flu’, 3: ‘Like a severe flu’, 4: ‘I was hospitalised’, 5: ‘I was treated at an ICU’). They also  
529 had to check which symptoms they experienced during the Covid-19 infection. For a list of  
530 corresponding binary variables, see column 1 of Table 3. These variables were used for computing  
531 the severity of symptoms index as the mean z-score of all 22 variables. Participants were also asked  
532 to provide the dates of the beginning and end of their illness: this information was used to calculate  
533 the duration of the disease.

534 In another part of the questionnaire, respondents answered questions about their current physical  
535 health. They indicated how often they suffer from headache, rhinitis, gastrointestinal problems  
536 (problems including nausea, vomiting, or diarrhoea), sore throat or cough, allergy, sleeping problems,  
537 urinary tract inflammation, fatigue, and viral or bacterial infection, using an 8-point scale (1 – Never,

538 2 – Less than once a year, 3 – Once a year, 4 – Twice a year, 5 – Four times a year, 6 – Once a month,  
539 7 – Once a week, 8 – More often). They also indicated how many drugs prescribed by physicians  
540 (except for contraceptives and drugs for mental health problems) they use and were asked to list  
541 which health problems (possible aftereffects of Covid-19) they ‘suffer from currently’ (fever, cough,  
542 breathlessness, sore throat, headache, stomach pain, diarrhoea, chest pain or pressure on the chest,  
543 conjunctivitis, middle ear pain, loss of smell, loss of taste, skin rash, changes in skin pigmentation,  
544 problems speaking and walking, fatigue, sniffles, sinus inflammation, joint and muscle pain, other  
545 pains, other health problems); these binary variables were coded 0/1. Then they rated how they are  
546 feeling currently in terms of their physical health using a graphic scale 0–100 anchored with 0 – Very  
547 well and 100 – Very bad. The index of physical illness was calculated as a mean z-score from these 32  
548 variables. Participants also rated whether they suffer from depression and anxiety (two binary  
549 variables) and how often they suffer from depression, anxiety, and auditory hallucinations using an 8-  
550 point scale (1 – Never, 2 – Less than once a year, 3 – Once a year, 4 – Twice a year, 5 – Four times a  
551 year, 6 – Once a month, 7 – Once a week, 8 – More often), and how many drugs for mental health  
552 problems prescribed by medical professionals they take. Finally, they were asked to rate how they  
553 are feeling today in terms of their mental health using a graphic scale 0–100 anchored with 0 – Very  
554 well and 100 – Very bad. The index of mental illness was calculated as a mean z-score from these  
555 seven variables. In another part of the questionnaire, participants rated the darkness of their hair,  
556 their skin, redness of their hair, and provided information about their weight and height. They also  
557 answered how many children younger than 10 years and younger than 20 years live with them in the  
558 same household.

### 559 **Statistical analyses**

560 Statistical analyses were performed with the R v. 3.3.1 software <sup>45</sup>. To compute partial Kendall  
561 correlation, contingency table tests, and t-tests, we used the Explorer package <sup>46</sup>. Correction for  
562 multiple tests was done using the Benjamini-Hochberg procedure with false discovery rate pre-set to  
563 0.20 <sup>47</sup>. The dataset is available at public repository Figshare 10.6084/m9.figshare.16529184 <sup>48</sup>.

564 **Acknowledgments:** We would like to thank Anna Pilátová, PhD. for her help with preparing the final  
565 version of the article. This research was funded by Czech Science Foundation, grant number 18-  
566 13692S.

567 **Author Contributions:** Conceptualization, original draft preparation, funding acquisition, and  
568 supervision, J.F.; formal analysis, writing—review and editing, investigation J.F., L.P. J.P. All authors  
569 have read and agreed to the published version of the manuscript.

570 **Conflicts of Interest:** The authors declare no conflict of interest.

571 **Data Availability Statement:** All data are available at Figshare 10.6084/m9.figshare.16529184 <sup>48</sup>.

572

573 **References**

574

- 575 1 Pijls, B. G. *et al.* Demographic risk factors for COVID-19 infection, severity, ICU admission and  
576 death: a meta-analysis of 59 studies. *Bmj Open* **11**, e044640, doi:10.1136/bmjopen-2020-  
577 044640 (2021).
- 578 2 Ho, F. K. *et al.* Modifiable and non-modifiable risk factors for COVID-19, and comparison to  
579 risk factors for influenza and pneumonia: results from a UK Biobank prospective cohort  
580 study. *Bmj Open* **10**, e040402, doi:10.1136/bmjopen-2020-040402 (2020).
- 581 3 van den Broek-Altenburg, E. M. *et al.* Jobs, housing, and mask wearing: Cross-sectional study  
582 of risk factors for COVID-19. *JMIR Public Health and Surveillance* **7**, 151-160,  
583 doi:10.2196/24320 (2021).
- 584 4 McQuade, E. T. R. *et al.* Assessment of seroprevalence of SARS-CoV-2 and risk factors  
585 associated with COVID-19 infection among outpatients in Virginia. *Jama Netw Open* **4**,  
586 e2035234, doi:10.1001/jamanetworkopen.2020.35234 (2021).
- 587 5 Ji, W. J. *et al.* Overweight and obesity are risk factors for coronavirus disease 2019: A  
588 propensity score-matched case-control study. *Endocrinol Metab* **36**, 196-200,  
589 doi:10.3803/EnM.2020.856 (2021).
- 590 6 Castilla, J. *et al.* Risk factors of infection, hospitalization and death from SARS-CoV-2: A  
591 population-based cohort study. *J Clin Med* **10**, 2608, doi:10.3390/Jcm10122608 (2021).
- 592 7 Simons, D., Shahab, L., Brown, J. & Perski, O. The association of smoking status with SARS-  
593 CoV-2 infection, hospitalization and mortality from COVID-19: a living rapid evidence review  
594 with Bayesian meta-analyses (version 7). *Addiction* **116**, 1319-1368, doi:10.1111/add.15276  
595 (2021).
- 596 8 Vos, E. R. A. *et al.* Nationwide seroprevalence of SARS-CoV-2 and identification of risk factors  
597 in the general population of the Netherlands during the first epidemic wave. *J Epidemiol*  
598 *Commun H* **75**, 489-495, doi:10.1136/jech-2020-215678 (2021).
- 599 9 Flegr, J. Toxoplasmosis: An important risk factor for acquiring SARS-CoV-2 infection and a  
600 severe course of Covid-19 disease. *medRxiv*, 2021.2005.2015.21257257,  
601 doi:10.1101/2021.05.15.21257257 (2021).
- 602 10 Decaro, N. *et al.* SARS-CoV-2 infection in dogs and cats: Facts and speculations. *Front. Vet.*  
603 *Sci.* **8**, 619207, doi:10.3389/Fvets.2021.619207 (2021).
- 604 11 Engin, A. B., Engin, E. D. & Engin, A. Two important controversial risk factors in SARS-CoV-2  
605 infection: Obesity and smoking. *Environ Toxicol Phar* **78**, 103411,  
606 doi:10.1016/J.Etap.2020.103411 (2020).
- 607 12 Katz, J., Yue, S. J. & Xue, W. Increased risk for COVID-19 in patients with vitamin D deficiency.  
608 *Nutrition* **84**, 111106, doi:10.1016/J.Nut.2020.111106 (2021).
- 609 13 Flegr, J. *et al.* Increased 25(OH)D3 level in redheaded people: Could redheadedness be an  
610 adaptation to temperate climate? *Experimental Dermatology* **29**, 598-609,  
611 doi:10.1111/exd.14119 (2020).
- 612 14 Frost, P., Kleisner, K. & Flegr, J. Health status by gender, hair color, and eye color: Red-haired  
613 women are the most divergent. *PLoS One* **12**, doi:10.1371/journal.pone.0190238 (2017).
- 614 15 Flegr, J. & Sykorova, K. Skin fairness is a better predictor for impaired physical and mental  
615 health than hair redness. *Sci Rep* **9**, doi:10.1038/s41598-019-54662-5 (2019).
- 616 16 Barnkob, M. B. *et al.* Reduced prevalence of SARS-CoV-2 infection in ABO blood group O.  
617 *Blood Adv* **4**, 4990-4993, doi:10.1182/bloodadvances.2020002657 (2020).

- 618 17 Muniz-Diaz, E. *et al.* Relationship between the ABO blood group and COVID-19 susceptibility,  
619 severity and mortality in two cohorts of patients. *Blood Transfus-Italy* **19**, 54-63,  
620 doi:10.2450/2020.0256-20 (2021).
- 621 18 Liu, N. Y. *et al.* The impact of ABO blood group on COVID-19 infection risk and mortality: A  
622 systematic review and meta-analysis. *Blood Rev* **48**, 100785, doi:10.1016/j.Blre.2020.100785  
623 (2021).
- 624 19 Flegr, J., Toman, J., Hula, M. & Kankova, S. The role of balancing selection in maintaining  
625 human RhD blood group polymorphism: A preregistered cross-sectional study. *J Evolution*  
626 *Biol*, doi:10.1111/jeb.13745 (2020).
- 627 20 Batty, G. D. *et al.* Psychosocial factors and hospitalisations for COVID-19: Prospective cohort  
628 study based on a community sample. *Brain Behav Immun* **89**, 569-578,  
629 doi:10.1016/j.bbi.2020.06.021 (2020).
- 630 21 Hamer, M., Kivimaki, M., Gale, C. R. & Batty, G. D. Lifestyle risk factors, inflammatory  
631 mechanisms, and COVID-19 hospitalization: A community-based cohort study of 387,109  
632 adults in UK. *Brain Behav Immun* **87**, 184-187, doi:10.1016/j.bbi.2020.05.059 (2020).
- 633 22 Coclite, D. *et al.* Face mask use in the community for reducing the spread of COVID-19: A  
634 systematic review. *Front Med-Lausanne* **7**, 594269, doi:10.3389/Fmed.2020.594269 (2021).
- 635 23 Bialas, A. J., Kumor-Kisielewska, A. & Gorski, P. Ageing, sex, obesity, smoking and COVID-19 -  
636 truths, myths and speculations. *Adv Respir Med* **88**, 335-342, doi:10.5603/Arm.2020.0133  
637 (2020).
- 638 24 Rahman, A. & Sathi, N. J. Risk factors of the severity of COVID-19: A meta-analysis.  
639 *International Journal of Clinical Practice* **75**, doi:10.1111/ijcp.13916 (2021).
- 640 25 Zheng, Z. H. *et al.* Risk factors of critical & mortal COVID-19 cases: A systematic literature  
641 review and meta-analysis. *J Infection* **81**, E16-E25, doi:10.1016/j.jinf.2020.04.021 (2020).
- 642 26 Sanchez-Ramirez, D. C. & Mackey, D. Underlying respiratory diseases, specifically COPD, and  
643 smoking are associated with severe COVID-19 outcomes: A systematic review and meta-  
644 analysis. *Resp Med* **171**, 106096, doi:10.1016/J.Rmed.2020.106096 (2020).
- 645 27 Drozd, M. *et al.* Current state of knowledge about role of pets in zoonotic transmission of  
646 SARS-CoV-2. *Viruses-Basel* **13**, 1149, doi:10.3390/V13061149 (2021).
- 647 28 Conti, P. *et al.* The British variant of the new coronavirus-19 (Sars-Cov-2) should not create a  
648 vaccine problem. *Journal of Biological Regulators and Homeostatic Agents* **35**, 1-4,  
649 doi:10.23812/21-3-E (2021).
- 650 29 Flegr, J. & Horáček, J. Toxoplasmosis, but not borreliosis, is associated with psychiatric  
651 disorders and symptoms. *Schizophr. Res.* **197**, 603-604, doi:10.1016/j.schres.2018.02.008  
652 (2018).
- 653 30 Katengua-Thamahane, E. *et al.* The combination of red palm oil and rooibos show anti-  
654 inflammatory effects in rats. *Journal of Inflammation-London* **11**, 41, doi:10.1186/s12950-  
655 014-0041-4 (2014).
- 656 31 Ku, S. K., Kwak, S., Kim, Y. & Bae, J. S. Aspalathin and nothofagin from rooibos (*Aspalathus*  
657 *linearis*) inhibits high glucose-induced inflammation *in vitro* and *in vivo*. *Inflammation* **38**,  
658 445-455, doi:10.1007/s10753-014-0049-1 (2015).
- 659 32 Lee, W. & Bae, J. S. Anti-inflammatory effects of aspalathin and nothofagin from rooibos  
660 (*Aspalathus linearis*) *in vitro* and *in vivo*. *Inflammation* **38**, 1502-1516, doi:10.1007/s10753-  
661 015-0125-1 (2015).
- 662 33 Smith, C. & Swart, A. C. Rooibos (*Aspalathus linearis*) facilitates an anti-inflammatory state,  
663 modulating IL-6 and IL-10 while not inhibiting the acute glucocorticoid response to a mild  
664 novel stressor *in vivo*. *Journal of Functional Foods* **27**, 42-54, doi:10.1016/j.jff.2016.08.055  
665 (2016).
- 666 34 Lawal, A. O. *et al.* The cardiovascular protective effects of rooibos (*Aspalathus linearis*)  
667 extract on diesel exhaust particles induced inflammation and oxidative stress involve NF-  
668 kappa B- and Nrf2-dependent pathways modulation. *Heliyon* **5**, e01426,  
669 doi:10.1016/j.heliyon.2019.e01426 (2019).

- 670 35 Ajuwon, O. R., Oguntibeju, O. O. & Marnewick, J. L. Amelioration of lipopolysaccharide-  
671 induced liver injury by aqueous rooibos (*Aspalathus linearis*) extract via inhibition of pro-  
672 inflammatory cytokines and oxidative stress. *Bmc Complementary and Alternative Medicine*  
673 **14**, 392, doi:10.1186/1472-6882-14-392 (2014).
- 674 36 Baba, H. *et al.* Studies of anti-inflammatory effects of Rooibos tea in rats. *Pediatrics*  
675 *International* **51**, 700-704, doi:10.1111/j.1442-200X.2009.02835.x (2009).
- 676 37 Althouse, A. D. Adjust for multiple comparisons? It's not that simple. *Ann Thorac Surg* **101**,  
677 1644-1645, doi:10.1016/j.athoracsur.2015.11.024 (2016).
- 678 38 Nakagawa, S. A farewell to Bonferroni: the problems of low statistical power and publication  
679 bias. *Behavioral Ecology* **15**, 1044-1045, doi:DOI 10.1093/beheco/arh107 (2004).
- 680 39 McDonald, J. H. *Handbook of Biological Statistics*. 3rd edn, (Sparky House Publishing, 2014).
- 681 40 Fedak, K. M., Bernal, A., Capshaw, Z. A. & Gross, S. Applying the Bradford Hill criteria in the  
682 21st century: how data integration has changed causal inference in molecular epidemiology.  
683 *Emerging Themes in Epidemiology* **12**, 14, doi:10.1186/s12982-015-0037-4 (2015).
- 684 41 Horwitz, R. I. & Feinstein, A. R. The problem of "protopathic bias" in case-control studies *The*  
685 *American Journal of Medicine* **68**, 255 (1980).
- 686 42 Flegr, J. Influence of latent *Toxoplasma* infection on human personality, physiology and  
687 morphology: pros and cons of the *Toxoplasma*-human model in studying the manipulation  
688 hypothesis. *Journal of Experimental Biology* **216**, 127-133, doi:10.1242/jeb.073635 (2013).
- 689 43 Flegr, J. & Horáček, J. *Toxoplasma*-infected subjects report an obsessive-compulsive disorder  
690 diagnosis more often and score higher in obsessive-compulsive inventory. *Eur Psychiat* **40**,  
691 82-87, doi:10.1016/j.eurpsy.2016.09.001 (2017).
- 692 44 Kankova, S., Flegr, J. & Calda, P. An elevated blood glucose level and increased incidence of  
693 gestational diabetes mellitus in pregnant women with latent toxoplasmosis. *Folia*  
694 *Parasitologica* **62** (2015).
- 695 45 R Core Team. in *R: A language and environment for statistical computing*. *R Foundation for*  
696 *Statistical Computing* (Vienna, Austria, 2018).
- 697 46 Flegr, J. & Flegr, P. Doing exploratory analysis in R with a package Explorer v. 1.0. *Figshare*,  
698 doi:10.6084/m9.figshare.14559993.v1 (2021).
- 699 47 Benjamini, Y. & Hochberg, Y. Controlling the false discovery rate: A practical and powerful  
700 approach to multiple testing. *Journal of the Royal Statistical Society Series B-Methodological*  
701 **57**, 289-300 (1995).
- 702 48 Flegr, J. Data for the study: Effects of 105 biological, socioeconomic, behavioural, and  
703 environmental factors on the risk of SARS-CoV-2 infection and a severe course of Covid-19: A  
704 prospective longitudinal study. *Figshare* (2021).

705

706
